# Supplementary material
Source: PubMed Central journal article supplement (PMC9707522)
Supplement: NIHMS1844909-supplement-1844909_RS.pdf [file NIHMS1844909-supplement-1844909_RS.pdf]

## Reporting Summary

Nature Portfolio wishes to improve the reproducibility of the work that we publish. This form provides structure for consistency and transparency in reporting. For further information on Nature Portfolio policies, see our [Editorial Policies](#) and the [Editorial Policy Checklist](#).

### Statistics

For all statistical analyses, confirm that the following items are present in the figure legend, table legend, main text, or Methods section.

n/a Confirmed

- The exact sample size ( $n$ ) for each experimental group/condition, given as a discrete number and unit of measurement
- A statement on whether measurements were taken from distinct samples or whether the same sample was measured repeatedly
- The statistical test(s) used AND whether they are one- or two-sided  
*Only common tests should be described solely by name; describe more complex techniques in the Methods section.*
- A description of all covariates tested
- A description of any assumptions or corrections, such as tests of normality and adjustment for multiple comparisons
- A full description of the statistical parameters including central tendency (e.g. means) or other basic estimates (e.g. regression coefficient) AND variation (e.g. standard deviation) or associated estimates of uncertainty (e.g. confidence intervals)
- For null hypothesis testing, the test statistic (e.g.  $F$ ,  $t$ ,  $r$ ) with confidence intervals, effect sizes, degrees of freedom and  $P$  value noted  
*Give  $P$  values as exact values whenever suitable.*
- For Bayesian analysis, information on the choice of priors and Markov chain Monte Carlo settings
- For hierarchical and complex designs, identification of the appropriate level for tests and full reporting of outcomes
- Estimates of effect sizes (e.g. Cohen's  $d$ , Pearson's  $r$ ), indicating how they were calculated

*Our web collection on [statistics for biologists](#) contains articles on many of the points above.*

### Software and code

Policy information about [availability of computer code](#)

Data collection

Data analysis

For manuscripts utilizing custom algorithms or software that are central to the research but not yet described in published literature, software must be made available to editors and reviewers. We strongly encourage code deposition in a community repository (e.g. GitHub). See the Nature Portfolio [guidelines for submitting code & software](#) for further information.

### Data

Policy information about [availability of data](#)

All manuscripts must include a [data availability statement](#). This statement should provide the following information, where applicable:

- Accession codes, unique identifiers, or web links for publicly available datasets
- A description of any restrictions on data availability
- For clinical datasets or third party data, please ensure that the statement adheres to our [policy](#)

All raw and processed ChIP-seq, ATAC-seq, CUT&RUN and RNA-seq data have been deposited in the NCBI Gene Expression Omnibus under accession number GSE168644. Mass spectrophotometry raw files were deposited on the public repository Chorus (chorusproject.org) with the project number 1763.

## Field-specific reporting

Please select the one below that is the best fit for your research. If you are not sure, read the appropriate sections before making your selection.

Life sciences  Behavioural & social sciences  Ecological, evolutionary & environmental sciences

For a reference copy of the document with all sections, see [nature.com/documents/nr-reporting-summary-flat.pdf](https://www.nature.com/documents/nr-reporting-summary-flat.pdf)

## Life sciences study design

All studies must disclose on these points even when the disclosure is negative.

|                 |                                                                                                                                                                                                                                                                                                                                                                                    |
|-----------------|------------------------------------------------------------------------------------------------------------------------------------------------------------------------------------------------------------------------------------------------------------------------------------------------------------------------------------------------------------------------------------|
| Sample size     | No sample size calculation was performed. Sample sizes were determined based on previous studies using similar techniques to enable statistical analysis.                                                                                                                                                                                                                          |
| Data exclusions | No data were excluded                                                                                                                                                                                                                                                                                                                                                              |
| Replication     | Experiments were done at least in 3 biological replicates. See methods and figure captions.                                                                                                                                                                                                                                                                                        |
| Randomization   | Mice were randomly divided into treatment group.                                                                                                                                                                                                                                                                                                                                   |
| Blinding        | For experiments others than animal studies investigators were not blinded to allocation during experiments and outcome assessment. However, two different individuals separately reproduced each other results for key experiments. For mouse studies, researchers were blinded to treatment group during data collection (mouse/tumor assessment and measurement, Ki67 staining ) |

## Reporting for specific materials, systems and methods

We require information from authors about some types of materials, experimental systems and methods used in many studies. Here, indicate whether each material, system or method listed is relevant to your study. If you are not sure if a list item applies to your research, read the appropriate section before selecting a response.

### Materials & experimental systems

### Methods

| n/a                                 | Involved in the study                                           | n/a                                 | Involved in the study                              |
|-------------------------------------|-----------------------------------------------------------------|-------------------------------------|----------------------------------------------------|
| <input type="checkbox"/>            | <input checked="" type="checkbox"/> Antibodies                  | <input type="checkbox"/>            | <input checked="" type="checkbox"/> ChIP-seq       |
| <input type="checkbox"/>            | <input checked="" type="checkbox"/> Eukaryotic cell lines       | <input type="checkbox"/>            | <input checked="" type="checkbox"/> Flow cytometry |
| <input checked="" type="checkbox"/> | <input type="checkbox"/> Palaeontology and archaeology          | <input checked="" type="checkbox"/> | <input type="checkbox"/> MRI-based neuroimaging    |
| <input type="checkbox"/>            | <input checked="" type="checkbox"/> Animals and other organisms |                                     |                                                    |
| <input checked="" type="checkbox"/> | <input type="checkbox"/> Human research participants            |                                     |                                                    |
| <input checked="" type="checkbox"/> | <input type="checkbox"/> Clinical data                          |                                     |                                                    |
| <input checked="" type="checkbox"/> | <input type="checkbox"/> Dual use research of concern           |                                     |                                                    |

## Antibodies

| Antibodies used | Antibody                                                                 | Source Identifier                | Application      | WB dilution/ChIP amount | Clone     | Lot           |
|-----------------|--------------------------------------------------------------------------|----------------------------------|------------------|-------------------------|-----------|---------------|
|                 | Rabbit polyclonal Anti-KDM1/LSD1 antibody                                | ChIP grade abcam ab17721         | western and ChIP | 1:1000/10ug             | N/A       | GR332777379-1 |
|                 | Rb polyclonal anti CoREST                                                | EMD-Millipore 07-455             | WB and ChIP      | 1:1000/10ug             | N/A       | 3230538       |
|                 | Rb polyclonal anti ER alpha                                              | abcam ab3575                     | WB and ChIP      | 1:1000/5ug              | N/A       |               |
|                 | Rb polyclonal Anti-FOXA1 antibody                                        | abcam ab23738                    | WB and ChIP      | 1:1000/5ug              | N/A       |               |
|                 | Rb polyclonal to c-JUN                                                   | abcam ab31419                    | WB and ChIP      | 1:1000/10ug             | N/A       | GR03661531    |
|                 | Rb monoclonal Rpb1 NTD                                                   | Cell Signaling Technology 14958S | ChIP             | 5ug                     | (D8L4Y)   |               |
|                 | Rb Anti-Histone H3 (acetyl K27) antibody - ChIP Grade                    | abcam ab4729                     | ChIP             | 2ug                     | N/A       | GR306603-1    |
|                 | Rabbit monoclonal SMARCC1/BAF155                                         | Cell Signaling Technology 11956S | WB and ChIP      | 1:1000/10ug             | D7F8S     | 4             |
|                 | Normal Rabbit IgG Polyclonal Antibody control                            | EMD-Millipore 12-370             | IP               | 10ug                    | N/A       | 3281600       |
|                 | Rabbit polyclonal Anti-Histone H3 antibody Nuclear Marker and ChIP Grade | Abcam ab1791                     | WB               | 1:4000                  | N/A       | GR300978-2    |
|                 | Rabbit polyclonal Histone H3K27me3 antibody                              | Active Motif 39155               | WB               | 1:1000                  | N/A       | 10918019      |
|                 | Rabbit polyclonal Histone H3K4me2 antibody                               | Active Motif 39141               | WB and ChIP      | 1:1000/2ug              | N/A       | 01008001      |
|                 | Rabbit monoclonal antibody to HDAC1                                      | Cell Signaling Technology 34589  | WB               | 1:1000                  | D5C6UXP®  | 1             |
|                 | Rabbit IgG CUT&RUN Negative Control Antibody                             | EpiCypher 13-0042K               | CUT&RUN          | 0.5ug                   | N/A       |               |
|                 | Rabbit polyclonal H3K27ac Antibody - ChIP-seq Grade                      | Diagenode C15410196              | CUT&RUN          | 0.5ug                   | N/A       |               |
|                 | Rabbit polyclonal Anti-Histone H3 (mono methyl K4) antibody - ChIP Grade | abcam ab8895                     | WB and CUT&RUN   | 1:1000/0.5ug            | N/A       |               |
|                 | Rabbit monoclonal Anti-Vimentin antibody- Cytoskeleton Marker            | abcam ab92547                    | WB               | 1:1000                  | EPR3776   | GR3258719-26  |
|                 | Mouse Monoclonal Anti-Vinculin antibody                                  | Sigma-Aldrich V9131              | WB               | 1:400                   | hVIN1     |               |
|                 | Mouse anti E-cadherin Monoclonal Antibody                                | Invitrogen 13-1700               | WB               | 2:1000                  | HECD-1    |               |
|                 | Rabbit monoclonal anti SUZ12                                             | Cell Signaling Technology 3737   | WB               | 1: 1000                 | D39F6 XP® | 6             |
|                 | Rabbit monoclonal anti Ezh2                                              | Cell Signaling Technology 5246   | WB               | 1:1000                  | D2C9 XP®  | 9             |

|                                                                |                           |           |      |        |                  |             |
|----------------------------------------------------------------|---------------------------|-----------|------|--------|------------------|-------------|
| Mouse monoclonal p44/42 MAPK (Erk1/2)                          | Cell Signaling Technology | 4696      | WB   | 1:1000 | L34F12           | 23          |
| Rabbit monoclonal Phospho-p44/42 MAPK (Erk1/2) (Thr202/Tyr204) | Cell Signaling Technology | 4370      | WB   | 1:1000 | D13.14.4E XP®    | 24          |
| Rabbit monoclonal Anti-DPF2/REQ antibody                       | abcam                     | ab134942  | WB   | 1:1000 | EPR9206(B)       | GR3275112-4 |
| Rabbit monoclonal to ARID1A/BAF25                              | Cell Signaling Technology | 12354     | WB   | 1:1000 | D2A8U            | 3           |
| Rabbit monoclonal Anti-MBD3 antibody                           | Grade abcam               | ab157464  | WB   | 1:1000 | EPR9913          | GR117405-18 |
| Rabbit polyclonal ARID2 Antibody                               | Bethyl Laboratories       | A302-229A | WB   | 1:1000 | N/A              | 2           |
| Rabbit polyclonal anti 53BP1                                   | Novus Biological          | NB100-304 | IF   | 1:1000 |                  |             |
| Mouse Anti-phospho-Histone H2A.X (Ser139)                      | Antibody Millipore Sigma  | 05-636    | IF   | 1:1000 | JBW301           |             |
| RAD51                                                          | B-Bridge International    | 70-001    | IF   | 1:1000 |                  |             |
| Rabbit monoclonal anti STAT1                                   | Cell Signaling Technology | 14994     | WB   | 1:1000 | D1K9Y            | 4           |
| Rabbit monoclonal Anti-LSD2 / AOF1 antibody                    | abcam                     | ab193080  | WB   | 1:1000 | EPR18508         |             |
| Rabbit monoclonal Phospho-Stat1 (Tyr701)                       | Cell Signaling Technology | 9167      | WB   | 1:1000 | 58D6             |             |
| APC anti-human CD24                                            | BioLegend                 | 311118    | FACS | 1ug    | ML5              |             |
| PE anti-mouse/human CD44                                       | BioLegend                 | 103024    | FACS | 1ug    | IM7]             |             |
| 488 Fluor Donkey anti-Rabbit antibody                          | Thermo Fischer            | A-21207   | IF   | 1:1000 | RRID: AB_141637  |             |
| 594 Fluor Goat anti-Mouse antibody                             | Thermo Fischer            | A-11020   | IF   | 1:1000 | RRID: AB_2534087 |             |
| Ki-67 Rabbit mAb (Mouse Preferred; IHC Formulated)             | CST                       | 12202     | IF   | 1:400  | D3B5             | 6           |

## Validation

-anti KDM1-LSD1, KO validated, 197 citations <https://www.citeab.com/antibodies/735963-ab17721-anti-kdm1-bsd1-antibody-nuclear-marker?des=39c7b10a7299d7ff>

-anti CoREST, knockdown validated, 56 citations <https://www.citeab.com/antibodies/221362-07-455-anti-corest-antibody?des=fc25c76d2aca07e4>

-anti ER alpha, 23 citations <https://www.citeab.com/antibodies/728748-ab3575-anti-estrogen-receptor-alpha-antibody?des=1ba4e0df1ced2e69>

- anti FOXA1, KO validated, 134 citations <https://www.citeab.com/antibodies/731175-ab23738-anti-foxa1-antibody?des=0660c7fee8213b22>

- anti c-JUN knockdown validated in this study, 67 citations <https://www.citeab.com/antibodies/715369-ab31419-anti-c-jun-antibody?des=d0533d8f7085ac32>

-anti Rpb1 NTD, 31 citations <https://www.citeab.com/antibodies/2455386-14958-rpb1-ntd-d8l4y-rabbit-mab?des=ebf5d646d583df7a>

-anti H3K27ac ,1478 citations <https://www.citeab.com/antibodies/778149-ab4729-anti-histone-h3-acetyl-k27-antibody-chip-g?des=c7a4376276c98cee>

-anti SMARCC1, 27 citations <https://www.citeab.com/antibodies/701347-11956-smarcc1-baf155-d7f8s-rabbit-mab?des=99fe689847d1fdac>

-Normal rabbit IgG, 567 citations <https://www.citeab.com/antibodies/222152-12-370-normal-rabbit-igg?des=d312535c25aff0e7>

-anti H3, 3803 citations <https://www.citeab.com/antibodies/763778-ab1791-anti-histone-h3-antibody-nuclear-marker-and?des=19d0e7a705c29e47>

-anti H3K27me3, orthogonal validation, 250 citations, <https://www.citeab.com/antibodies/82315-39155-histone-h3k27me3-antibody-pab?des=61d048528c0ebd33>

- anti H3K4me2 , orthogonal validations, 52 citations, <https://www.citeab.com/antibodies/82308-39141-histone-h3k4me2-antibody-pab?des=01abb281f0b852a5>

-anti HDAC1, 40 citations, <https://www.citeab.com/antibodies/4008726-34589-hdac1-d5c6u-xp-rabbit-mab?des=9bd5e9a685038130>

-anti H3K27ac Diagenode, 90 citations, <https://www.citeab.com/antibodies/3323242-c15410196-h3k27ac-antibody-chip-seq-grade?des=f58387a2db876612>

-anti H3K4me1, 908 citations, <https://www.citeab.com/antibodies/778274-ab8895-anti-histone-h3-mono-methyl-k4-antibody-ch?des=77b0107c2c9244cf>

-anti Vimentin, KO validated, 1027 citations, <https://www.citeab.com/antibodies/759376-ab92547-anti-vimentin-antibody-epr3776-cytoskeleton?des=9e05cf3ba7ee3bc3>

-anti vinculin, 1441 citations, <https://www.citeab.com/antibodies/1038439-v9131-monoclonal-anti-vinculin-antibody-produced-in?des=0813b01714838b11>

-anti E-cadherin, 274 citations, <https://www.citeab.com/antibodies/12179183-13-1700-e-cadherin-monoclonal-antibody-hecd-1?des=6a098bf300445b6d>

-anti SUZ12, 148 citations, <https://www.citeab.com/antibodies/123399-3737-suz12-d39f6-xp-rabbit-mab?des=9a52004f8505dff4>

-anti EZH2, orthogonal validation, 411 citations, <https://www.citeab.com/antibodies/125154-5246-ezh2-d2c9-xp-rabbit-mab?des=3e269f5e53ce11e5>

-anti ERK1/2, Orthogonal, Biological Strategies, and Knockdown validation, 504 citations, <https://www.citeab.com/antibodies/124659-4696-p44-42-mapk-erk1-2-l34f12-mouse-mab?des=1eb65efe17511444>

-anti pERK, Biological Strategies and Orthogonal validation, 5013 citations, <https://www.citeab.com/antibodies/124275-4370-phospho-p44-42-mapk-erk1-2-thr202-tyr204-d1?des=f2be8f77e26c20d4>

-anti DPF2, 6 citations, <https://www.citeab.com/antibodies/778744-ab134942-anti-dpf2-req-antibody-epr9206-b?des=29a30509c7fbf6c3>

-anti ARID1A, Biological Strategies and Orthogonal validation, 47 citations, <https://www.citeab.com/antibodies/1201491-12354-arid1a-baf250a-d2a8u-rabbit-mab?des=d607613c61c65e44>

-anti MBD3, KO validated, 17 citations, <https://www.citeab.com/antibodies/737853-ab157464-anti-mbd3-antibody-epr9913-chip-grade?des=77a427d26785f43d>

-anti 53BP1 validated by genetic strategy, 454 citations, <https://www.citeab.com/antibodies/406753-nb100-304-53bp1-antibody?des=937cba1a663f1f71>

-anti-phospho H2A.X, 2446 citations, <https://www.citeab.com/antibodies/221929-05-636-anti-phospho-histone-h2a-x-ser139-antibody?des=abb2da153fb7e8ba>

-anti Rad51, 5 citations, <https://www.citeab.com/antibodies/1204815-70-001-anti-human-rad51-antibody-rabbit-serum?des=4d7d94f11e9854e1>

-anti STAT1, validated by biological strategies, 145 citations, <https://www.citeab.com/antibodies/2455404-14994-stat1-d1k9y-rabbit-mab?des=aa848af94ec03b5e>

-anti LSD2, KO validated, 4 citations <https://www.citeab.com/antibodies/2929671-ab193080-anti-lsd2-aof1-antibody-epr18508?des=76d7e64e6f2a9c0f>

-anti phospho STAT1, biological strategies and orthogonal validation, 492 citations, <https://www.citeab.com/antibodies/125838-9167-phospho-stat1-tyr701-58d6-rabbit-mab?des=8988ea0ef9685771>  
 -anti CD24, 10 citations, <https://www.citeab.com/antibodies/522306-311118-apc-anti-human-cd24-antibody?des=5fea45d648497dcb>  
 -anti CD44, 25 citations, <https://www.citeab.com/antibodies/517944-103024-pe-anti-mouse-human-cd44-antibody?des=6f9d932d4b2b8aa9>  
 -alexa 488, 1672 citations <https://www.citeab.com/antibodies/search?q=A-21207>  
 -alexa 594, 194 citations, <https://www.citeab.com/antibodies/search?q=A-11020>  
 -kl67, 357 citations, <https://www.citeab.com/antibodies/701412-12202-ki-67-d3b5-rabbit-mab-mouse-preferred-ihc-f?des=7aedd9148eadc934>

## Eukaryotic cell lines

Policy information about [cell lines](#)

|                                                                   |                                                                                                                                                                                         |
|-------------------------------------------------------------------|-----------------------------------------------------------------------------------------------------------------------------------------------------------------------------------------|
| Cell line source(s)                                               | T47D (ATCC HTB-113), MDA-MB-231(ATCC HTB-26), 293T (ATCC #CRL-3216). T47D and MCF7 tamoxifen, fulvestrant resistant and long term estrogen deprived were generated in this study.       |
| Authentication                                                    | All cell lines generated in this study were validated by Western blotting, PCR and sequencing. T47D and MDA-MB231 were authenticated using ATCC authentication service (STR profiling). |
| Mycoplasma contamination                                          | All cell lines were screened twice a month for mycoplasma contamination and are negative                                                                                                |
| Commonly misidentified lines (See <a href="#">ICLAC</a> register) | No commonly misidentified cell lines were used                                                                                                                                          |

## Animals and other organisms

Policy information about [studies involving animals](#); [ARRIVE guidelines](#) recommended for reporting animal research

|                         |                                                                                                                                                              |
|-------------------------|--------------------------------------------------------------------------------------------------------------------------------------------------------------|
| Laboratory animals      | Female, 8 weeks old NOD Scid Gamma (NSG) mice were obtained from the Jackson Laboratory (Stock No. 002374) and bred inhouse for one generation.              |
| Wild animals            | No wild animals were used in this study                                                                                                                      |
| Field-collected samples | No field collected samples were used in this study                                                                                                           |
| Ethics oversight        | All procedures involving experimental procedures with mice were approved by the Institutional Animal Care and Use Committees (IACUC) of University of Miami. |

Note that full information on the approval of the study protocol must also be provided in the manuscript.

## ChIP-seq

### Data deposition

- Confirm that both raw and final processed data have been deposited in a public database such as [GEO](#).
- Confirm that you have deposited or provided access to graph files (e.g. BED files) for the called peaks.

Data access links  
*May remain private before publication.* <https://www.ncbi.nlm.nih.gov/geo/query/acc.cgi?acc=GSE168644>

Files in database submission

```

LTED_SMARCC1.75bp_5prime.nodup_x_LTED_input.75bp_5prime.nodup.pval.signal.bigwig
LTED_RCOR1.75bp_5prime.nodup_x_LTED_input.75bp_5prime.nodup.pval.signal.bigwig
T47D_LTED9M_LSD1_KO_LSD1.nodup_x_T47D_LTED9M_LSD1_KO_input.nodup.pval.signal.bigwig
T47D_LTED9M_LSD1_KO_cjun.nodup_x_T47D_LTED9M_LSD1_KO_input.nodup.pval.signal.bigwig
T47D_LTED9M_LSD1_KO_H3K4me2.nodup_x_T47D_LTED9M_LSD1_KO_input.nodup.pval.signal.bigwig
T47D_LTED9M_H3K4me2.nodup_x_lted_9m_input.nodup.pval.signal.bigwig
k27ac_rep1_wt2.nodup_x_T47D_WT2_input.nodup.pval.signal.bigwig
07_rnapol_wt2_rep1.nodup_x_T47D_WT2_input.nodup.pval.signal.bigwig
T47D_WT2_LSD1.nodup_x_T47D_WT2_input.nodup.pval.signal.bigwig
lted_9m_lsd1.nodup_x_lted_9m_input.nodup.pval.signal.bigwig
t47d_fm_CoRest.nodup_x_T47D_WT2_input.nodup.pval.signal.bigwig
T47D_WT2_ER.nodup_x_T47D_WT2_input.nodup.pval.signal.bigwig
foxa1_rep1_wt2.nodup_x_T47D_WT2_input.nodup.pval.signal.bigwig
lted_9m_shcjun_cjun.nodup_x_lted_9m_shcjun_input.nodup.pval.signal.bigwig
lted_9m_shcjun_lsd1.nodup_x_lted_9m_shcjun_input.nodup.pval.signal.bigwig
lted_9m_rnapol.nodup_x_lted_9m_input.nodup.pval.signal.bigwig
lted_9m_k27ac.nodup_x_lted_9m_input.nodup.pval.signal.bigwig
lted_9m_cjun.nodup_x_lted_9m_input.nodup.pval.signal.bigwig
09_fm_h3k27ac_R1_merged.srt.nodup_x_01_fm_igg_R1_merged.srt.nodup.pval.signal.bigwig
10_fm_lsd1_ko_2e8_h3k27ac_R1_merged.srt.nodup_x_02_fm_lsd1_ko_2e8_igg_R1_merged.srt.nodup.pval.signal.bigwig
11_lted_h3k27ac_R1_merged.srt.nodup_x_03_lted_igg_R1_merged.srt.nodup.pval.signal.bigwig
  
```

12\_lted\_lsd1\_ko\_2e10\_h3k27ac\_R1\_merged.srt.nodup\_x\_04\_lted\_lted\_lsd1\_ko\_2e10\_igg\_R1\_merged.srt.nodup.pval.signal.bigwig  
 13\_t47d\_lted\_shctrl\_h3k27ac\_R1\_merged.srt.nodup\_x\_05\_t47d\_lted\_shctrl\_igg\_R1\_merged.srt.nodup.pval.signal.bigwig  
 14\_t47d\_lted\_shlsd1\_2e4\_h3k27ac\_R1\_merged.srt.nodup\_x\_06\_t47d\_lted\_shlsd1\_2e4\_igg\_R1\_merged.srt.nodup.pval.signal.bigwig  
 15\_shlsd1\_lsd1\_4g4\_h3k27ac\_R1\_merged.srt.nodup\_x\_07\_shlsd1\_lsd1\_4g4\_igg\_R1\_merged.srt.nodup.pval.signal.bigwig  
 16\_shlsd1\_lsd1\_k661a\_6c10\_h3k27ac\_R1\_merged.srt.nodup\_x\_08\_shlsd1\_lsd1\_k661a\_6c10\_igg\_R1\_merged.srt.nodup.pval.signal.bigwig  
 17\_fm\_h3k4me1\_R1\_merged.srt.nodup\_x\_01\_fm\_igg\_R1\_merged.srt.nodup.pval.signal.bigwig  
 18\_fm\_lsd1\_ko\_2e8\_h3k4me1\_R1\_merged.srt.nodup\_x\_02\_fm\_lsd1\_ko\_2e8\_igg\_R1\_merged.srt.nodup.pval.signal.bigwig  
 19\_lted\_h3k4me1\_R1\_merged.srt.nodup\_x\_03\_lted\_igg\_R1\_merged.srt.nodup.pval.signal.bigwig  
 20\_lted\_lsd1\_ko\_2e10\_h3k4me1\_R1\_merged.srt.nodup\_x\_04\_lted\_lted\_lsd1\_ko\_2e10\_igg\_R1\_merged.srt.nodup.pval.signal.bigwig  
 21\_t47d\_lted\_shctrl\_h3k4me1\_R1\_merged.srt.nodup\_x\_05\_t47d\_lted\_shctrl\_igg\_R1\_merged.srt.nodup.pval.signal.bigwig  
 22\_t47d\_lted\_shlsd1\_2e4\_h3k4me1\_R1\_merged.srt.nodup\_x\_06\_t47d\_lted\_shlsd1\_2e4\_igg\_R1\_merged.srt.nodup.pval.signal.bigwig  
 23\_shlsd1\_lsd1\_4g4\_h3k4me1\_R1\_merged.srt.nodup\_x\_07\_shlsd1\_lsd1\_4g4\_igg\_R1\_merged.srt.nodup.pval.signal.bigwig  
 24\_shlsd1\_lsd1\_k661a\_6c10\_h3k4me1\_R1\_merged.srt.nodup\_x\_08\_shlsd1\_lsd1\_k661a\_6c10\_igg\_R1\_merged.srt.nodup.pval.signal.bigwig  
 08\_rnapol\_wt2\_rep2.nodup\_x\_T47D\_WT2\_input.nodup.pval.signal.bigwig  
 foxa1\_rep2\_wt2.nodup\_x\_T47D\_WT2\_input.nodup.pval.signal.bigwig  
 k27ac\_rep2\_wt2.nodup\_x\_T47D\_WT2\_input.nodup.pval.signal.bigwig  
 er\_rep2\_wt2.nodup\_x\_T47D\_WT2\_input.nodup.pval.signal.bigwig  
 T47D\_FM\_cjun\_rep1.nodup.30M\_x\_T47D\_FM\_2x\_rep1\_input\_fastq.gz.nodup.30M.pval.signal.bigwig  
 T47D\_FM\_cjun\_rep2.nodup.30M\_x\_T47D\_FM\_2x\_rep2\_input.nodup.30M.pval.signal.bigwig  
 T47D\_FM\_CoREST\_rep2.nodup.30M\_x\_T47D\_FM\_1x\_rep2\_input.nodup.30M.pval.signal.bigwig  
 T47D\_FM\_LSD1\_5ug.nodup\_x\_T47D\_FM\_Input.nodup.pval.signal.bigwig  
 T47D\_FM\_SMARCC1\_rep1.nodup.30M\_x\_T47D\_FM\_2x\_rep1\_input\_fastq.gz.nodup.30M.pval.signal.bigwig  
 T47D\_FM\_SMARCC1\_rep2.nodup.30M\_x\_T47D\_FM\_2x\_rep2\_input\_fastq.gz.nodup.30M.pval.signal.bigwig  
 T47D\_LTED9m17d\_cjun\_rep2.nodup.30M\_x\_T47D\_LTED9m17d\_1x\_rep2\_input.nodup.30M.pval.signal.bigwig  
 T47D\_LTED9m17d\_CoREST\_rep2.nodup.30M\_x\_T47D\_LTED9m17d\_2x\_rep2\_input.nodup.30M.pval.signal.bigwig  
 T47D\_LTED9m17d\_H3K4me2\_rep2.nodup.30M\_x\_T47D\_LTED9m17d\_1x\_rep2\_input.nodup.30M.pval.signal.bigwig  
 T47D\_LTED9m17d\_H3K27ac\_rep2.nodup.30M\_x\_T47D\_LTED9m17d\_1x\_rep2\_input.nodup.30M.pval.signal.bigwig  
 T47D\_LTED9m17d\_RNApol\_rep2.nodup.30M\_x\_T47D\_LTED9m17d\_1x\_rep2\_input.nodup.30M.pval.signal.bigwig  
 T47D\_LTED9m17d\_SMARCC1\_rep2.nodup.30M\_x\_T47D\_LTED9m17d\_2x\_rep2\_input.nodup.30M.pval.signal.bigwig  
 T47D\_LTED21M\_DMSO\_cjun\_rep1.nodup.30M\_x\_T47D\_LTED21M\_DMSO\_rep1\_input.nodup.30M.pval.signal.bigwig  
 T47D\_LTED21M\_DMSO\_cjun\_rep2.nodup.30M\_x\_T47D\_LTED21M\_DMSO\_rep2\_input.nodup.30M.pval.signal.bigwig  
 T47D\_LTED21M\_Corin\_cjun\_rep1.nodup.30M\_x\_T47D\_LTED21M\_Corin\_rep1\_input.nodup.30M.pval.signal.bigwig  
 T47D\_LTED21M\_Corin\_cjun\_rep2.nodup.30M\_x\_T47D\_LTED21M\_Corin\_rep2\_input.nodup.30M.pval.signal.bigwig  
 5-LTED-9MO-CTL-ANTI-FOXA1-REP1.srt.nodup\_x\_1-LTED-9MO-CTL-INPUT-REP1.srt.nodup.pval.signal.bigwig  
 6-LTED-9MO-CTL-ANTI-FOXA1-REP2.srt.nodup\_x\_2-LTED-9MO-CTL-INPUT-REP2.srt.nodup.pval.signal.bigwig  
 7-LTED-9MO-LSD1-KO-ANTI-FOXA1-REP1.srt.nodup\_x\_1-LTED-9MO-CTL-INPUT-REP1.srt.nodup.pval.signal.bigwig  
 8-LTED-9MO-LSD1-KO-ANTI-FOXA1-REP2.srt.nodup\_x\_2-LTED-9MO-CTL-INPUT-REP2.srt.nodup.pval.signal.bigwig  
 T47D\_LTED21M\_DMSO\_H3K4me2\_rep1.nodup.30M\_x\_T47D\_LTED21M\_DMSO\_rep1\_input.nodup.30M.pval.signal.bigwig  
 T47D\_LTED21M\_DMSO\_H3K4me2\_rep2.nodup.30M\_x\_T47D\_LTED21M\_DMSO\_rep2\_input.nodup.30M.pval.signal.bigwig  
 T47D\_LTED21M\_Corin\_H3K4me2\_rep1.nodup.30M\_x\_T47D\_LTED21M\_Corin\_rep1\_input.nodup.30M.pval.signal.bigwig  
 T47D\_LTED21M\_Corin\_H3K4me2\_rep2.nodup.30M\_x\_T47D\_LTED21M\_Corin\_rep2\_input.nodup.30M.pval.signal.bigwig  
 T47D\_LTED\_LSD1\_KO\_SMARCC1\_rep1.nodup.30M\_x\_T47D\_LTED\_LSD1\_KO\_2x\_rep1\_input.nodup.30M.pval.signal.bigwig  
 T47D\_LTED\_LSD1\_KO\_SMARCC1\_rep2.nodup.30M\_x\_T47D\_LTED\_LSD1\_KO\_2x\_rep2\_input.nodup.30M.pval.signal.bigwig  
 T47D\_LTED\_LSD1\_KO\_H3K4me2\_rep2.nodup.30M\_x\_T47D\_LTED\_LSD1\_KO\_1x\_rep2\_input.nodup.30M.pval.signal.bigwig  
 T47D\_LTED\_LSD1\_KO\_cjun\_rep2.nodup.30M\_x\_T47D\_LTED\_LSD1\_KO\_1x\_rep2\_input.nodup.30M.pval.signal.bigwig  
 T47D\_LTED\_shcontrol\_cjun\_rep2.nodup.30M\_x\_T47D\_LTED\_shcontrol\_rep2\_input.nodup.30M.pval.signal.bigwig  
 T47D\_LTED\_shcjun\_cjun\_rep2.nodup.30M\_x\_T47D\_LTED\_shcjun\_rep2\_input.nodup.30M.pval.signal.bigwig  
 09\_rnapol\_537\_rep1.nodup\_x\_T47D\_537\_input.nodup.pval.signal.bigwig  
 10\_rnapol\_537\_rep2.nodup\_x\_T47D\_537\_input.nodup.pval.signal.bigwig  
 er\_rep1\_537.merged.nodup\_x\_ctl\_for\_rep1.pval.signal.bigwig  
 er\_rep2\_537.merged.nodup\_x\_ctl\_for\_rep2.pval.signal.bigwig  
 foxa1\_rep1\_537.nodup\_x\_T47D\_537\_input.nodup.pval.signal.bigwig  
 foxa1\_rep2\_537.nodup\_x\_T47D\_537\_input.nodup.pval.signal.bigwig  
 T47D\_537\_LSD1\_33\_1.nodup\_x\_T47D\_537\_input\_rep2.nodup.pval.signal.bigwig  
 T47D\_537\_LSD1\_79\_1.nodup\_x\_T47D\_537\_input\_rep2.nodup.pval.signal.bigwig  
 T47D\_537\_LSD1.nodup\_x\_T47D\_537\_input.nodup.pval.signal.bigwig

Genome browser session  
(e.g. [UCSC](#))

All bigwig files were uploaded to GEO <https://www.ncbi.nlm.nih.gov/geo/query/acc.cgi?acc=GSE168644>

## Methodology

Replicates

All chip-seq were done in biological duplicates. Moreover, LSD1 and cJUN chip-seq were validated by ChIP-qPCR and genetic depletion in this study.

Sequencing depth

All ChIP-seq experiments were performed in a Nova-seq 75bp single-end and 30-40M were sequenced with >90% of mappable reads. ATAC-seq experiments were performed in a Nova-seq 75bp paired-end and 40M were sequenced with >90% of mappable reads. CUT&RUN experiments were performed in a Nova-seq 75bp paired-end and 8M were sequenced with >90% of mappable reads. RNA-

seq experiments were performed in a Nova-seq 100bp single-end and 20-30M were sequenced with >90% of mappable reads.

#### Antibodies

Antibodies Supplier Catalog  
 Rabbit polyclonal Anti-KDM1/LSD1 antibody ChIP grade abcam ab17721 Lot:GR332777379-1  
 Rb polyclonal anti CoREST EMD-Millipore 07-455 Lot:3230538  
 Rb polyclonal anti ER alpha abcam ab3575  
 Rb polyclonal Anti-FOXA1 antibody abcam ab23738  
 Rb polyclonal to c-JUN abcam ab31419 GR03661531  
 Rb monoclonal Rpb1 NTD Cell Signaling Technology 14958S (D8L4Y)  
 Rb Anti-Histone H3 (acetyl K27) antibody - ChIP Grade abcam ab4729 Lot:GR306603-1  
 Rabbit monoclonal SMARCC1/BAF155 Cell Signaling Technology 11956S D7F8S Lot:4  
 Rabbit polyclonal Histone H3K4me2 antibody Active Motif 39141 Lot: 01008001  
 Rabbit IgG CUT&RUN Negative Control Antibody EpiCypher 13-0042K  
 Rabbit polyclonal H3K27ac Antibody - ChIP-seq Grade Diagenode C15410196  
 Rabbit polyclonal Anti-Histone H3 (mono methyl K4) antibody - ChIP Grade abcam ab8895

#### Peak calling parameters

Peaks were called/signal tracks were generated using MACS2 v2.2.4, and peaks with fold change > 3.5 compared to input and FDR < 0.05 were used for subsequent analysis. Only default parameters were used. Bigwig file output from MACS was visualized in the UCSC genome browser. Homer annotatePeaks v4.11 was used for peak annotation and Bedtools v2.29.0 intersect was used to determine peak overlaps and assign target genes.

#### Data quality

ChIP-seq data was validated by looking at the replicates as well as ChIP-qPCR and ChIP-seq experiments in knockout and knockdown cells.

#### Software

Single-end ChIP-seq fastq files were processed using the ENCODE Transcription Factor and Histone ChIP-Seq processing pipeline (<https://github.com/ENCODE-DCC/chip-seq-pipeline2>). Reads were trimmed using cutadapt v2.5. Reads were aligned to the hg19 genome using Bowtie2 v2.3.4.3, and the SAMtools v1.9 was used to convert the output file to the BAM format. Duplicates were removed using Picard Tools v2.20.7. Peaks were called/signal tracks were generated using MACS2 v2.2.4, and peaks with fold change > 3.5 compared to input and FDR < 0.05 were used for subsequent analysis. Only default parameters were used. Bigwig file output from MACS was visualized in the UCSC genome browser. Homer annotatePeaks v4.11 was used for peak annotation and Bedtools v2.29.0 intersect was used to determine peak overlaps and assign target genes. NGS plot v2.63.1 from the Shen Lab (<https://github.com/shenlab-sinai/ngsplot>) was used to generate heatmaps and density plot.

## Flow Cytometry

### Plots

Confirm that:

- The axis labels state the marker and fluorochrome used (e.g. CD4-FITC).
- The axis scales are clearly visible. Include numbers along axes only for bottom left plot of group (a 'group' is an analysis of identical markers).
- All plots are contour plots with outliers or pseudocolor plots.
- A numerical value for number of cells or percentage (with statistics) is provided.

### Methodology

#### Sample preparation

For staining of the luminal and basal cell surface markers CD24 and CD44, respectively, 1 million freshly harvested cells were washed with cold PBS and pelleted. Cell pellets were dissolved in 100 uL of 1xPBS/BSA 0.5% and incubated in the presence of 1 ug of APC anti-human CD24 [ML5] (BioLegend-311118) and 1 µg of PE anti-mouse/human CD44 [IM7]. Cells were incubated with the antibodies in the dark for 30min at 4C and washed twice with cold 1xPBS.

#### Instrument

FACS Aria III sorter, CytoFLEX Flow Cytometer (Beckman Coulter)

#### Software

FlowJo, LLC

#### Cell population abundance

CD24 positive cells abundance went from 99.8% (parental) to 0.69% (reprogrammed) during resistance evolution while CD44 positive cells went from 0.042% (parental) to 96.5% (reprogrammed)

#### Gating strategy

T47D parental cells staining was used to define CD24 positive cells and CD44 negative.

Tick this box to confirm that a figure exemplifying the gating strategy is provided in the Supplementary Information.
