# Supplementary material
Source: PubMed Central journal article supplement (PMC9707522)

# Source Data Extended Data 2

## PRC2 inhibitor EPZ6438

a-

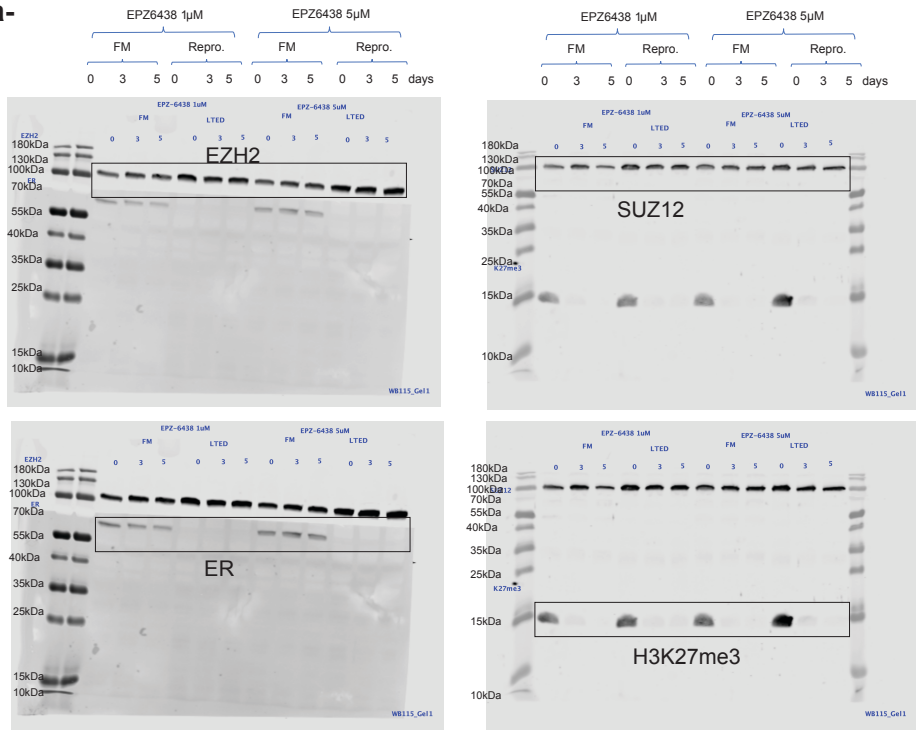

## PRC2 inhibitor GSK343

b-

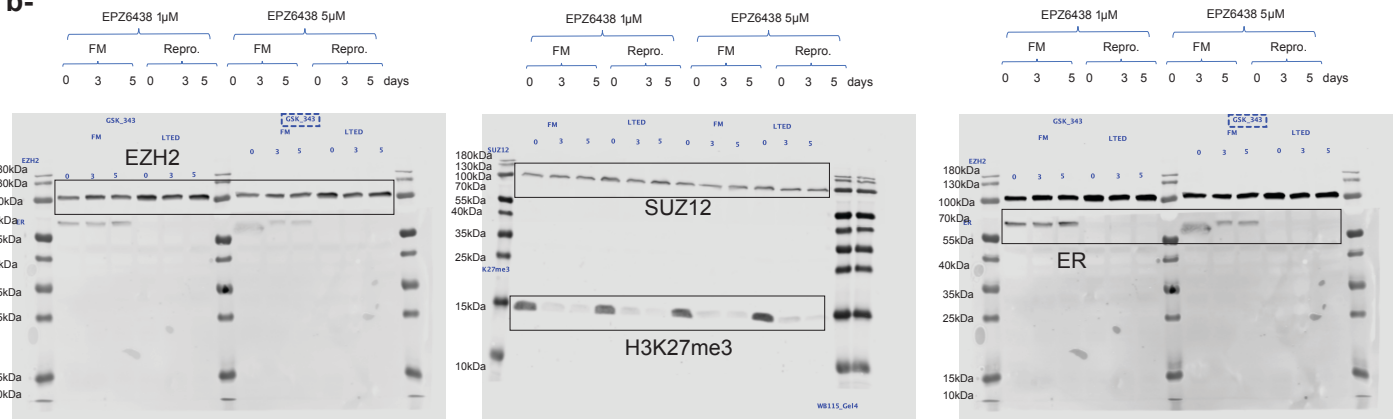

c-

### G9a inhibitor UNC0638

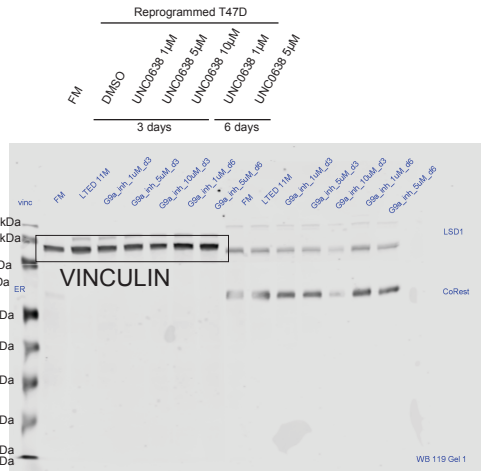

### G9a inhibitor UNC0638

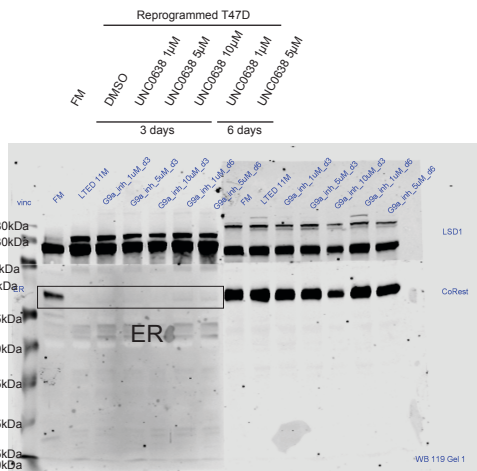

d-

### DNMT inhibitor Decitabine HDAC inhibitor SAHA

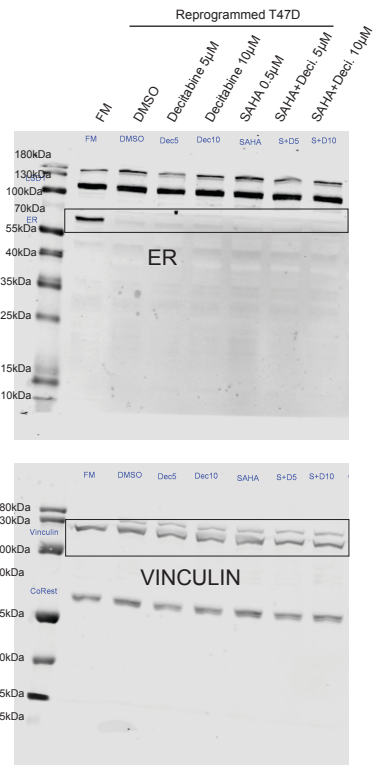

Supplement: NIHMS1844909-supplement-1844909_SD_ED_Fig_2.pdf [file NIHMS1844909-supplement-1844909_SD_ED_Fig_2.pdf]
