# Supplementary material
Source: PubMed Central journal article supplement (PMC9707522)
Supplement: NIHMS1844909-supplement-1844909_SD_ED_Fig_9.pdf [file NIHMS1844909-supplement-1844909_SD_ED_Fig_9.pdf]

# Source Data Extended Data 9

g-

Reprogrammed

| Parental | GSK343 |    | EPZ6438 |    | 5-azacitidine |    |
|----------|--------|----|---------|----|---------------|----|
|          | WT     | KO | WT      | KO | WT            | KO |
|          | 0      | 7  | 0       | 7  | 0             | 7  |

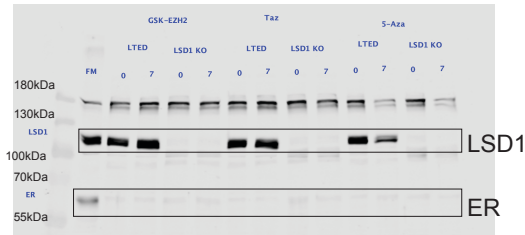

Reprogrammed

| Parental | GSK343 |    | EPZ6438 |    | 5-azacitidine |    |
|----------|--------|----|---------|----|---------------|----|
|          | WT     | KO | WT      | KO | WT            | KO |
|          | 0      | 7  | 0       | 7  | 0             | 7  |

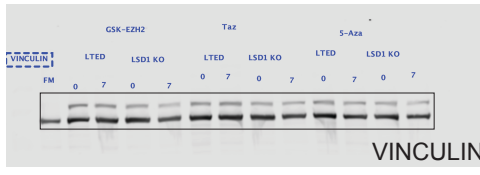

Reprogrammed

| Parental | GSK343 |    | EPZ6438 |    | 5-azacitidine |    |
|----------|--------|----|---------|----|---------------|----|
|          | WT     | KO | WT      | KO | WT            | KO |
|          | 0      | 7  | 0       | 7  | 0             | 7  |

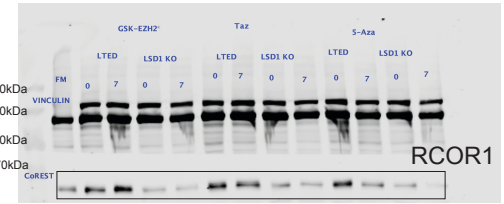

h-

WT Repro. KO Repro.

| Parental | DMSO |  | Aniso. 0.5µM |  | Aniso. 1µM |  |
|----------|------|--|--------------|--|------------|--|
|----------|------|--|--------------|--|------------|--|

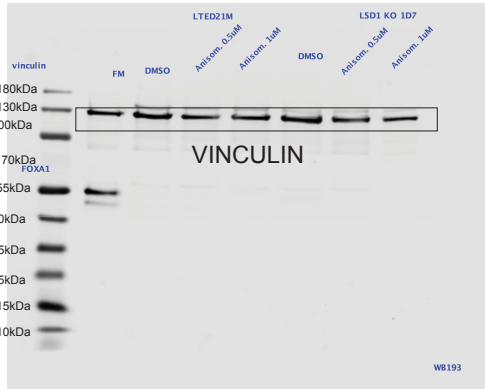

WT Repro. KO Repro.

| Parental | DMSO |  | Aniso. 0.5µM |  | Aniso. 1µM |  |
|----------|------|--|--------------|--|------------|--|
|----------|------|--|--------------|--|------------|--|

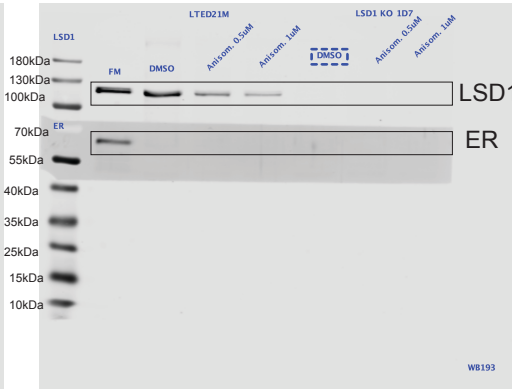

WT Repro. KO Repro.

| Parental | DMSO |  | Aniso. 0.5µM |  | Aniso. 1µM |  |
|----------|------|--|--------------|--|------------|--|
|----------|------|--|--------------|--|------------|--|

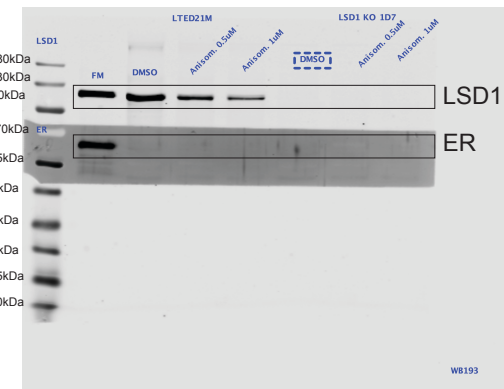

low exposure

high exposure
