# Supplementary material
Source: PubMed Central journal article supplement (PMC9707522)

Source Data Extended Data 10

g-

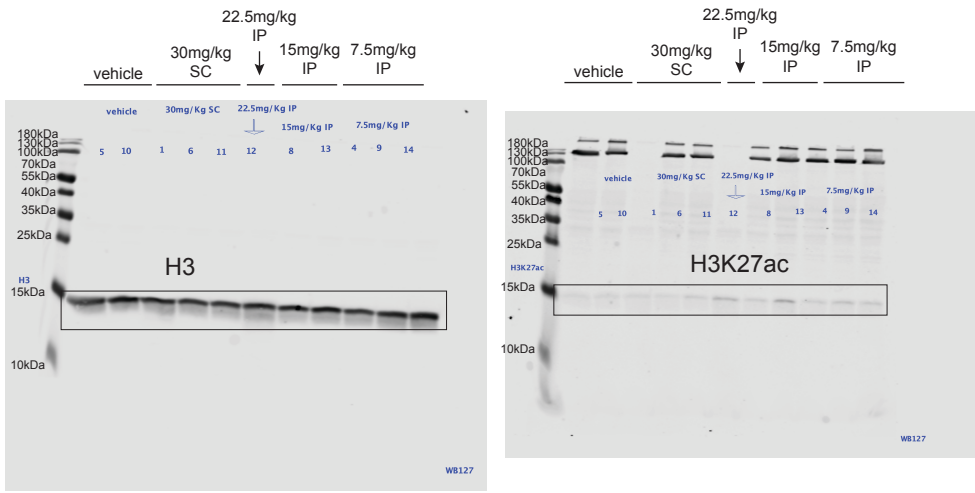

i-

MDA-MB-231 (TNBC)

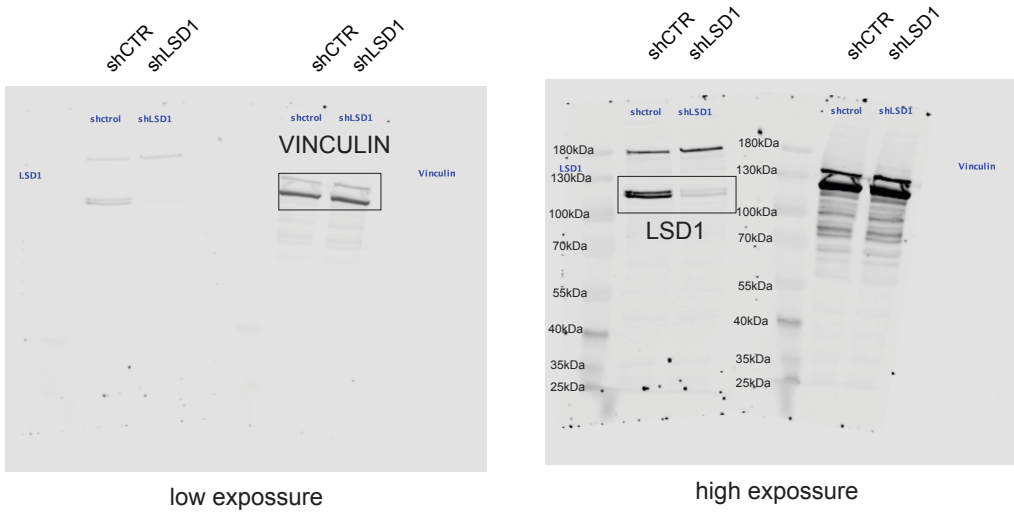

Supplement: NIHMS1844909-supplement-1844909_SD_ED_Fig_10.pdf [file NIHMS1844909-supplement-1844909_SD_ED_Fig_10.pdf]

# Source Data Extended Data 3

**b-**

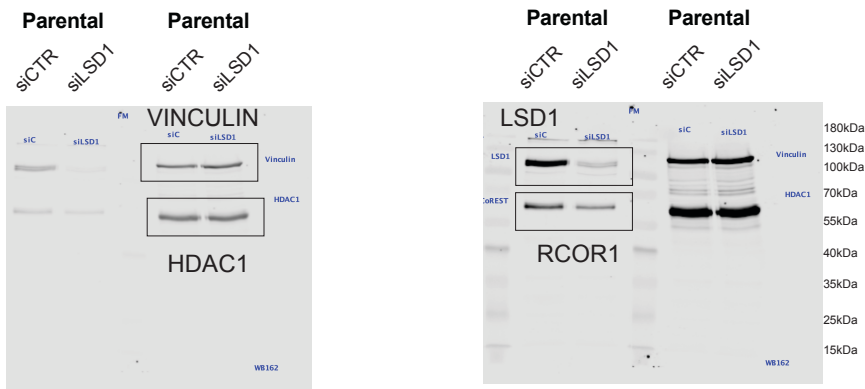

**c-**

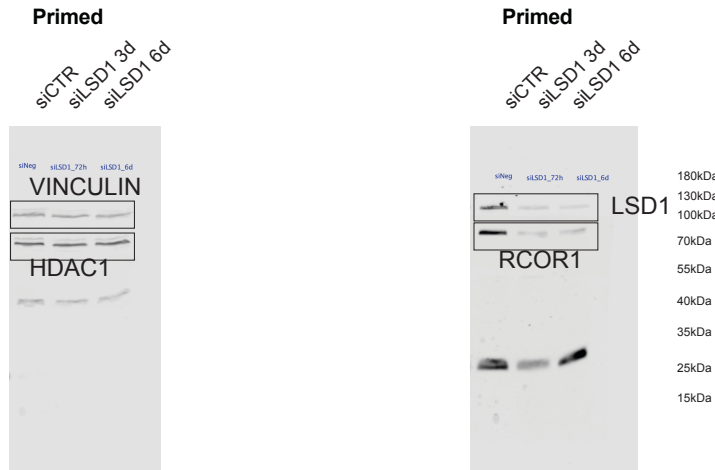

**d-**

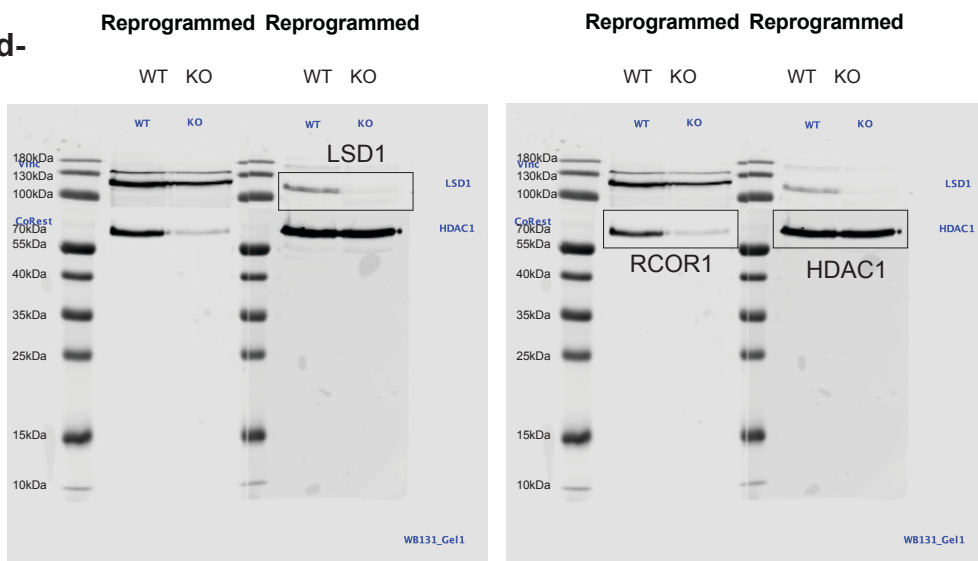

**e-**

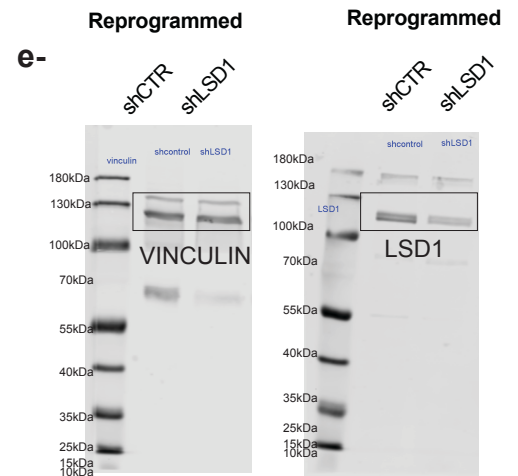

**i-**

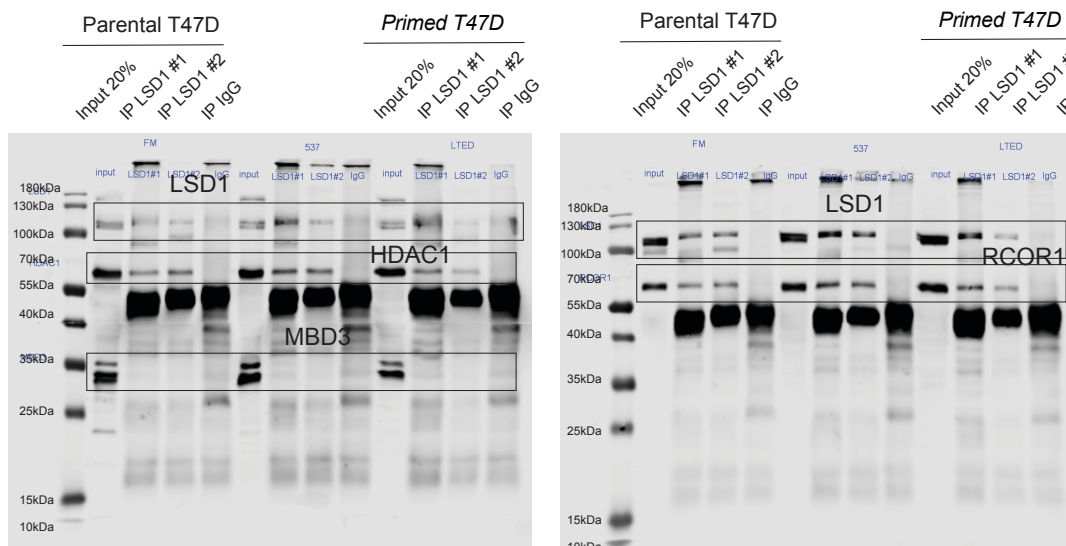

#1 Abcam  
#2 Diagenode

Supplement: NIHMS1844909-supplement-1844909_SD_ED_Fig_3.pdf [file NIHMS1844909-supplement-1844909_SD_ED_Fig_3.pdf]

# Source Data Extended Data 4

**a-**

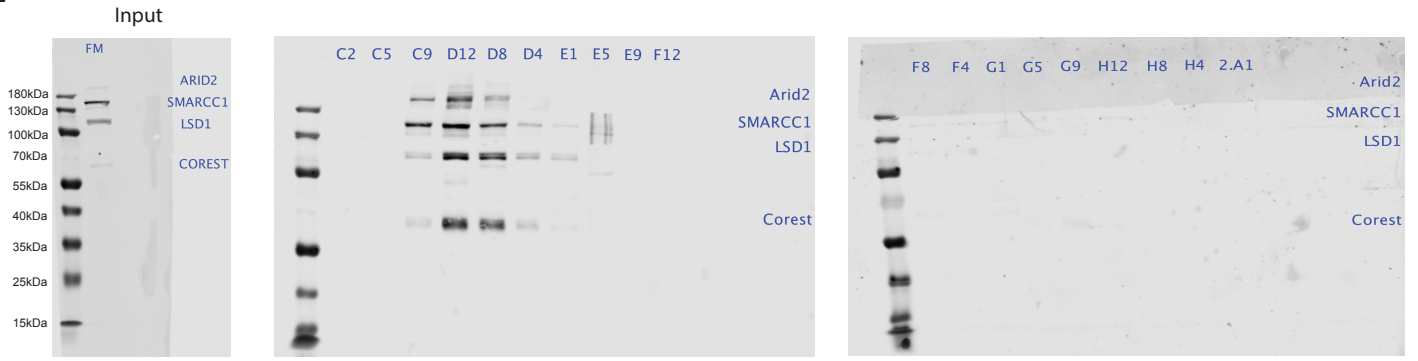

**b-**

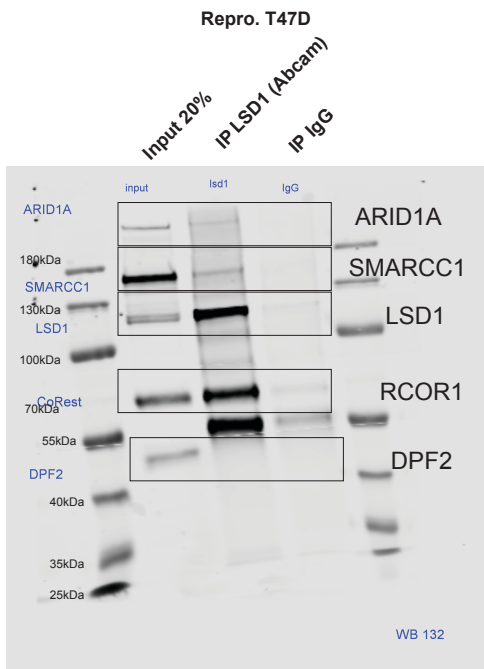

**c-**

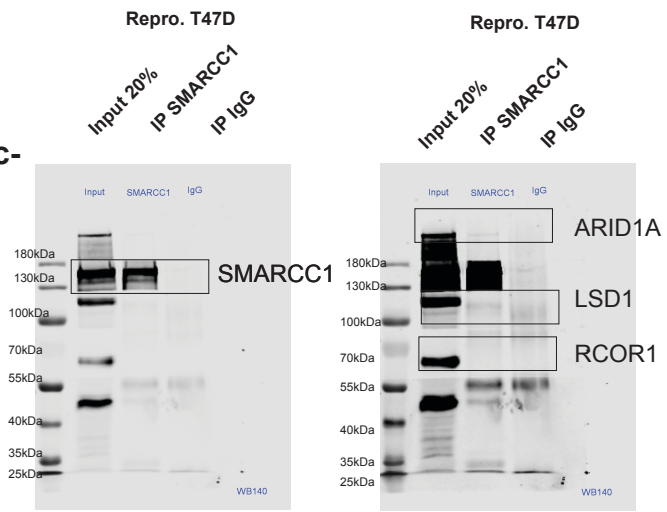

**d-**

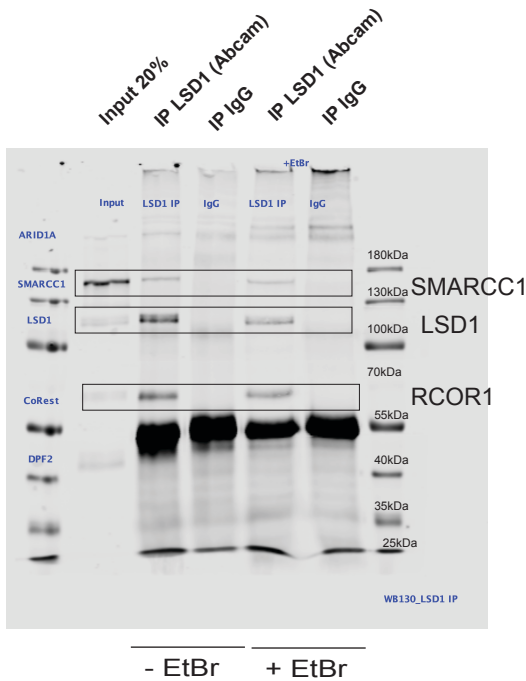

**h-**

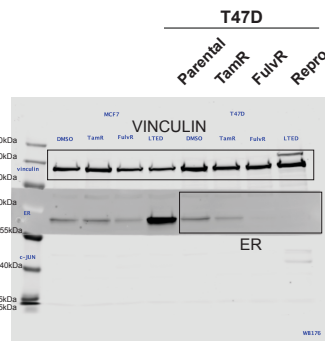

Supplement: NIHMS1844909-supplement-1844909_SD_ED_Fig_4.pdf [file NIHMS1844909-supplement-1844909_SD_ED_Fig_4.pdf]

# Source Data Extended Data 5

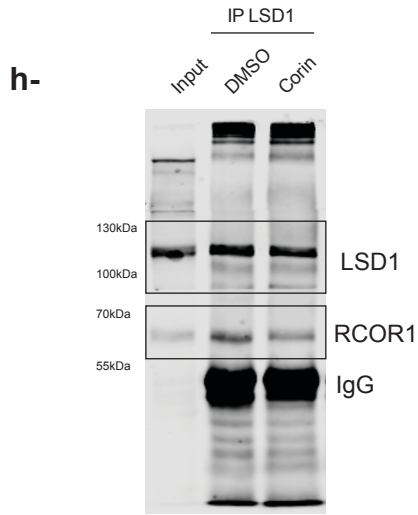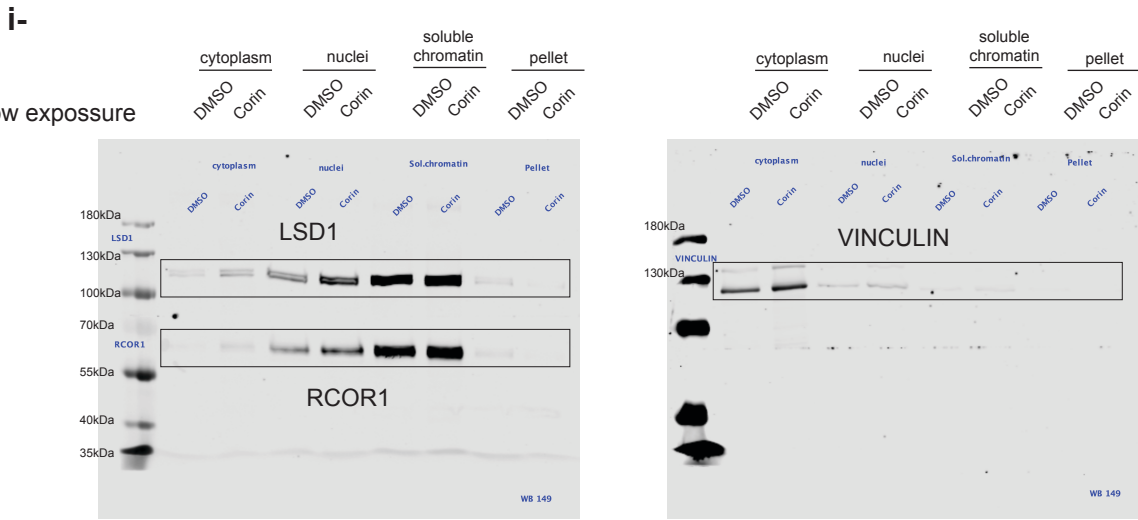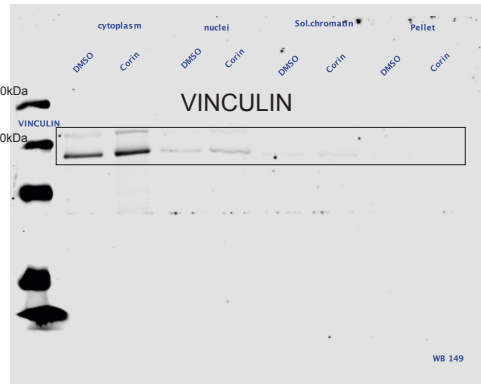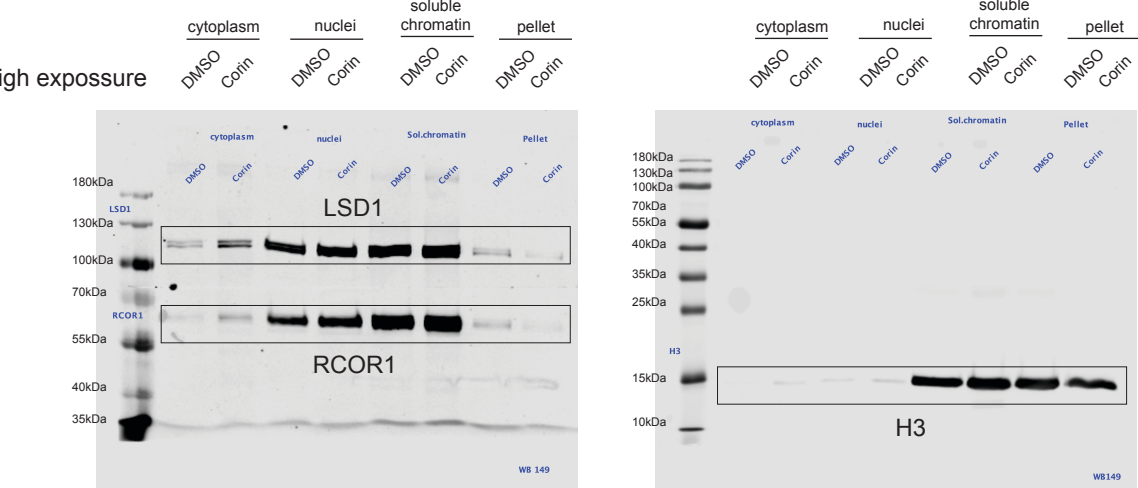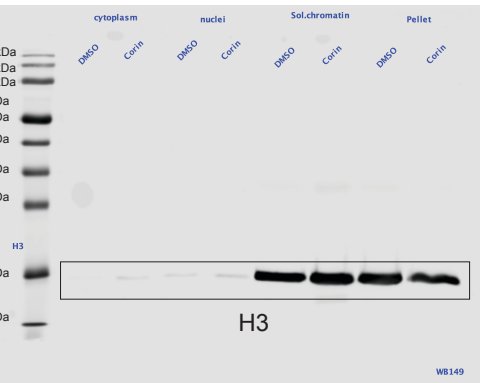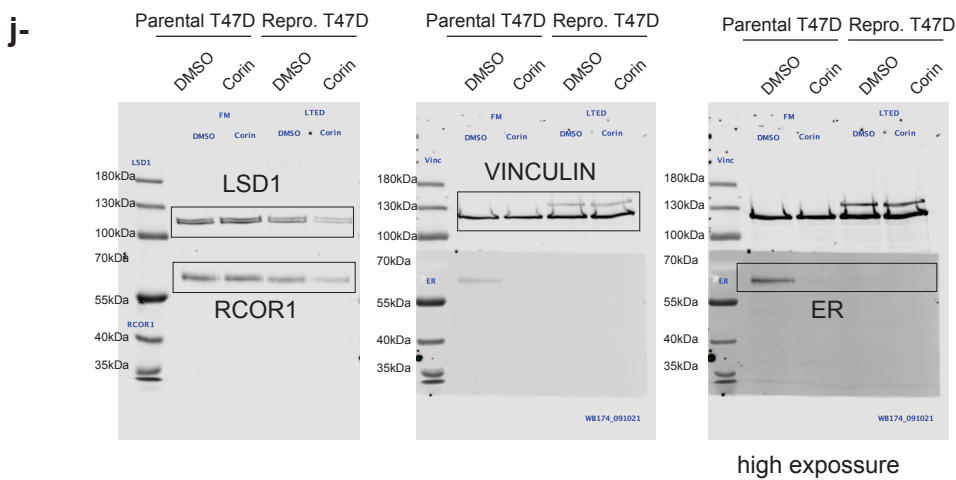

Supplement: NIHMS1844909-supplement-1844909_SD_ED_Fig_5.pdf [file NIHMS1844909-supplement-1844909_SD_ED_Fig_5.pdf]

# Source Data Extended Data 7

**c-**

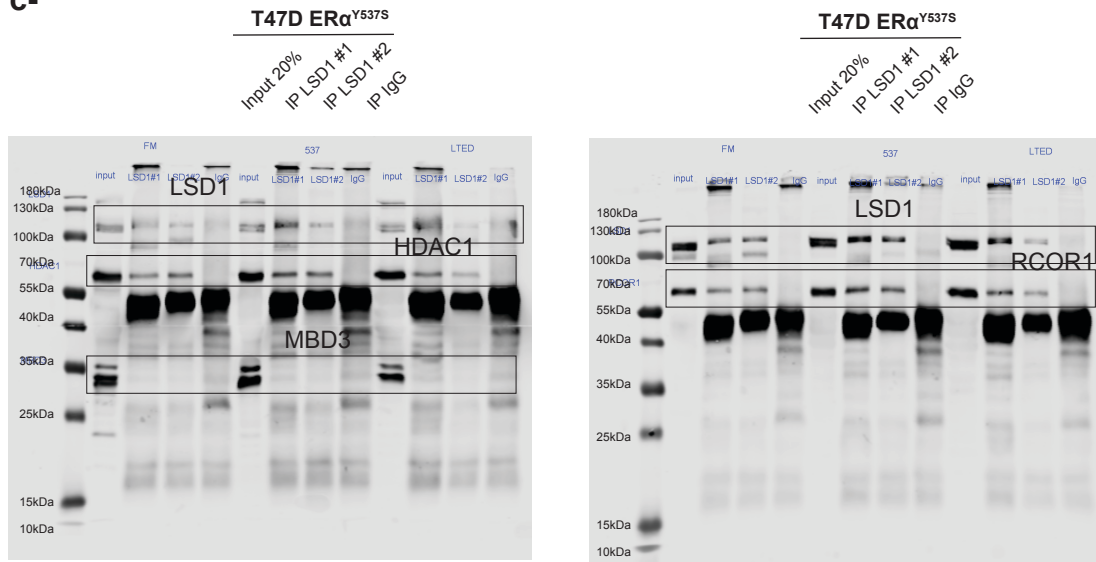

**j-**

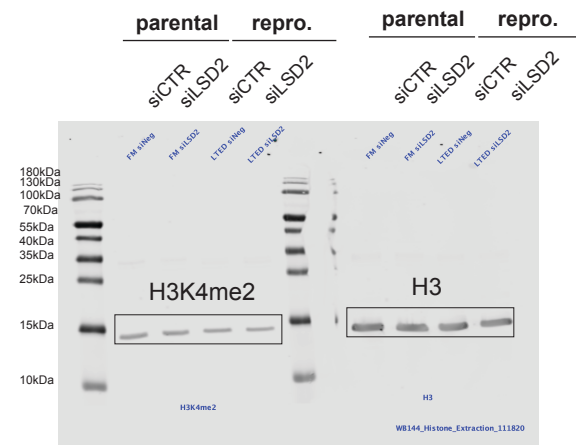

**k-**

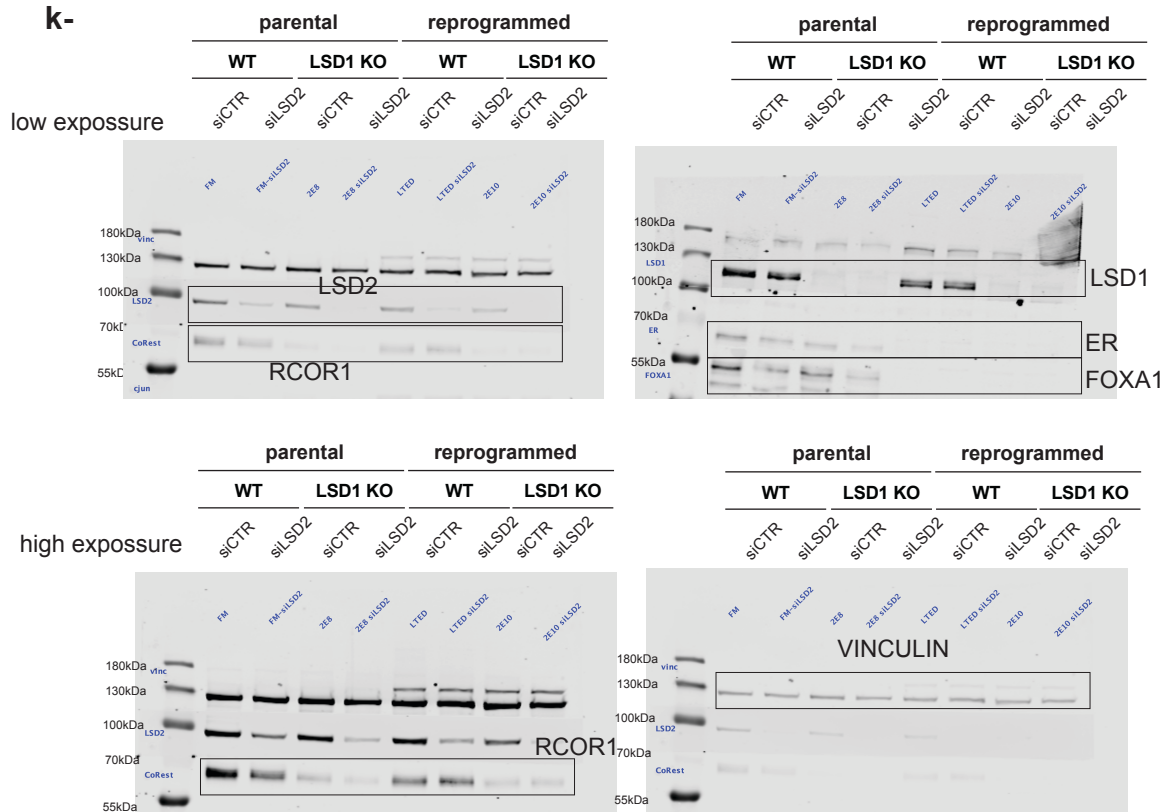

Supplement: NIHMS1844909-supplement-1844909_SD_ED_Fig_7.pdf [file NIHMS1844909-supplement-1844909_SD_ED_Fig_7.pdf]

# Source Data Extended Data 8

**a-**

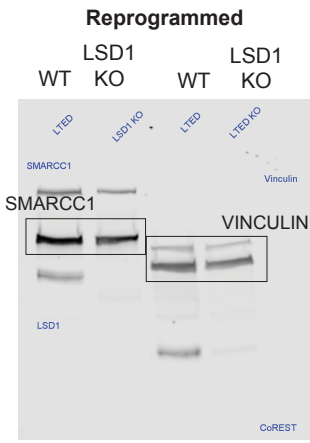

**e-**

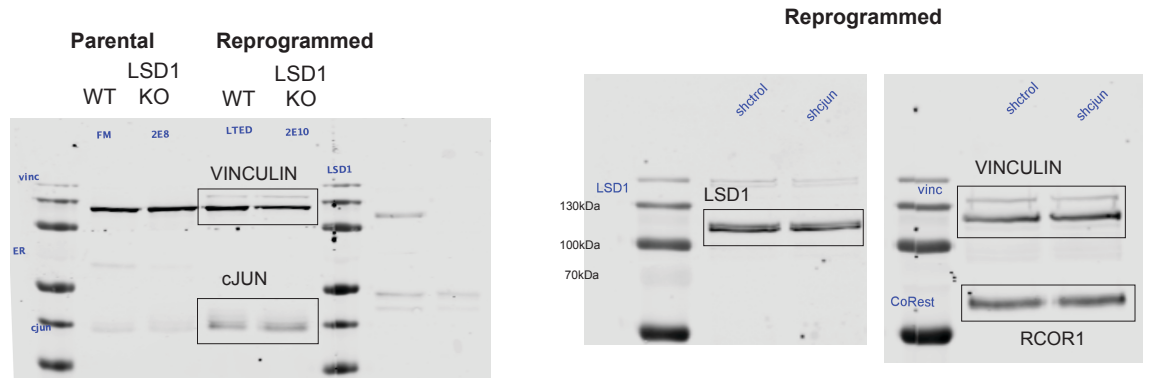

**i-**

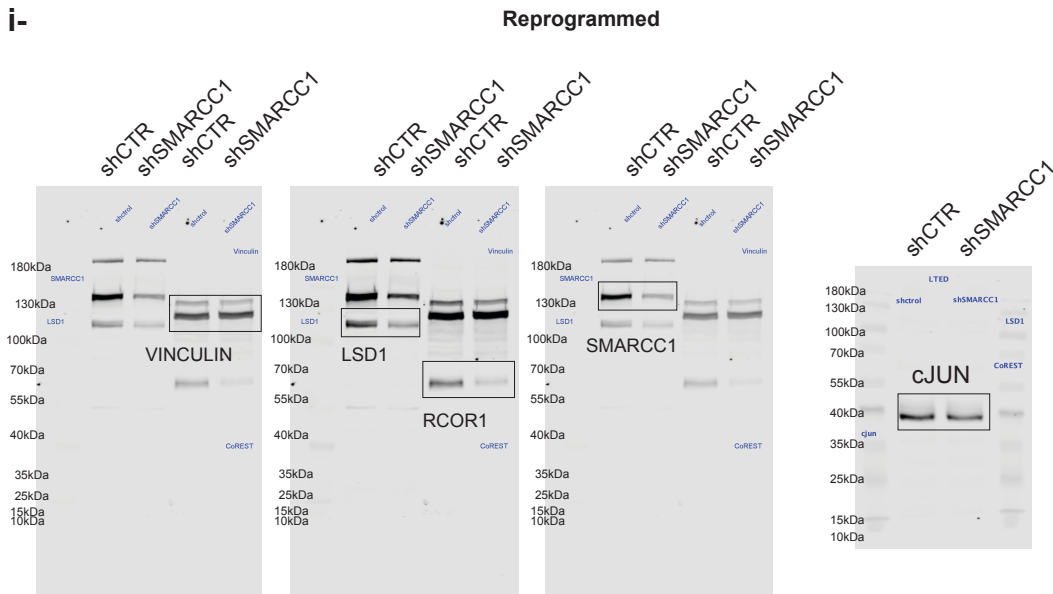

**Parental**

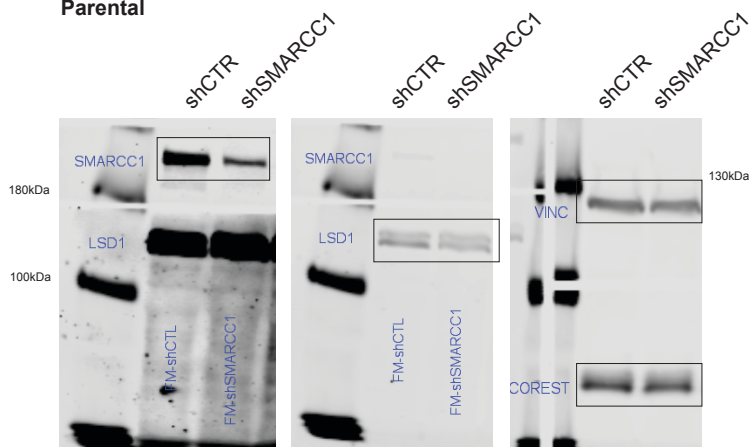

Supplement: NIHMS1844909-supplement-1844909_SD_ED_Fig_8.pdf [file NIHMS1844909-supplement-1844909_SD_ED_Fig_8.pdf]

# Source Data Figure 1

g-

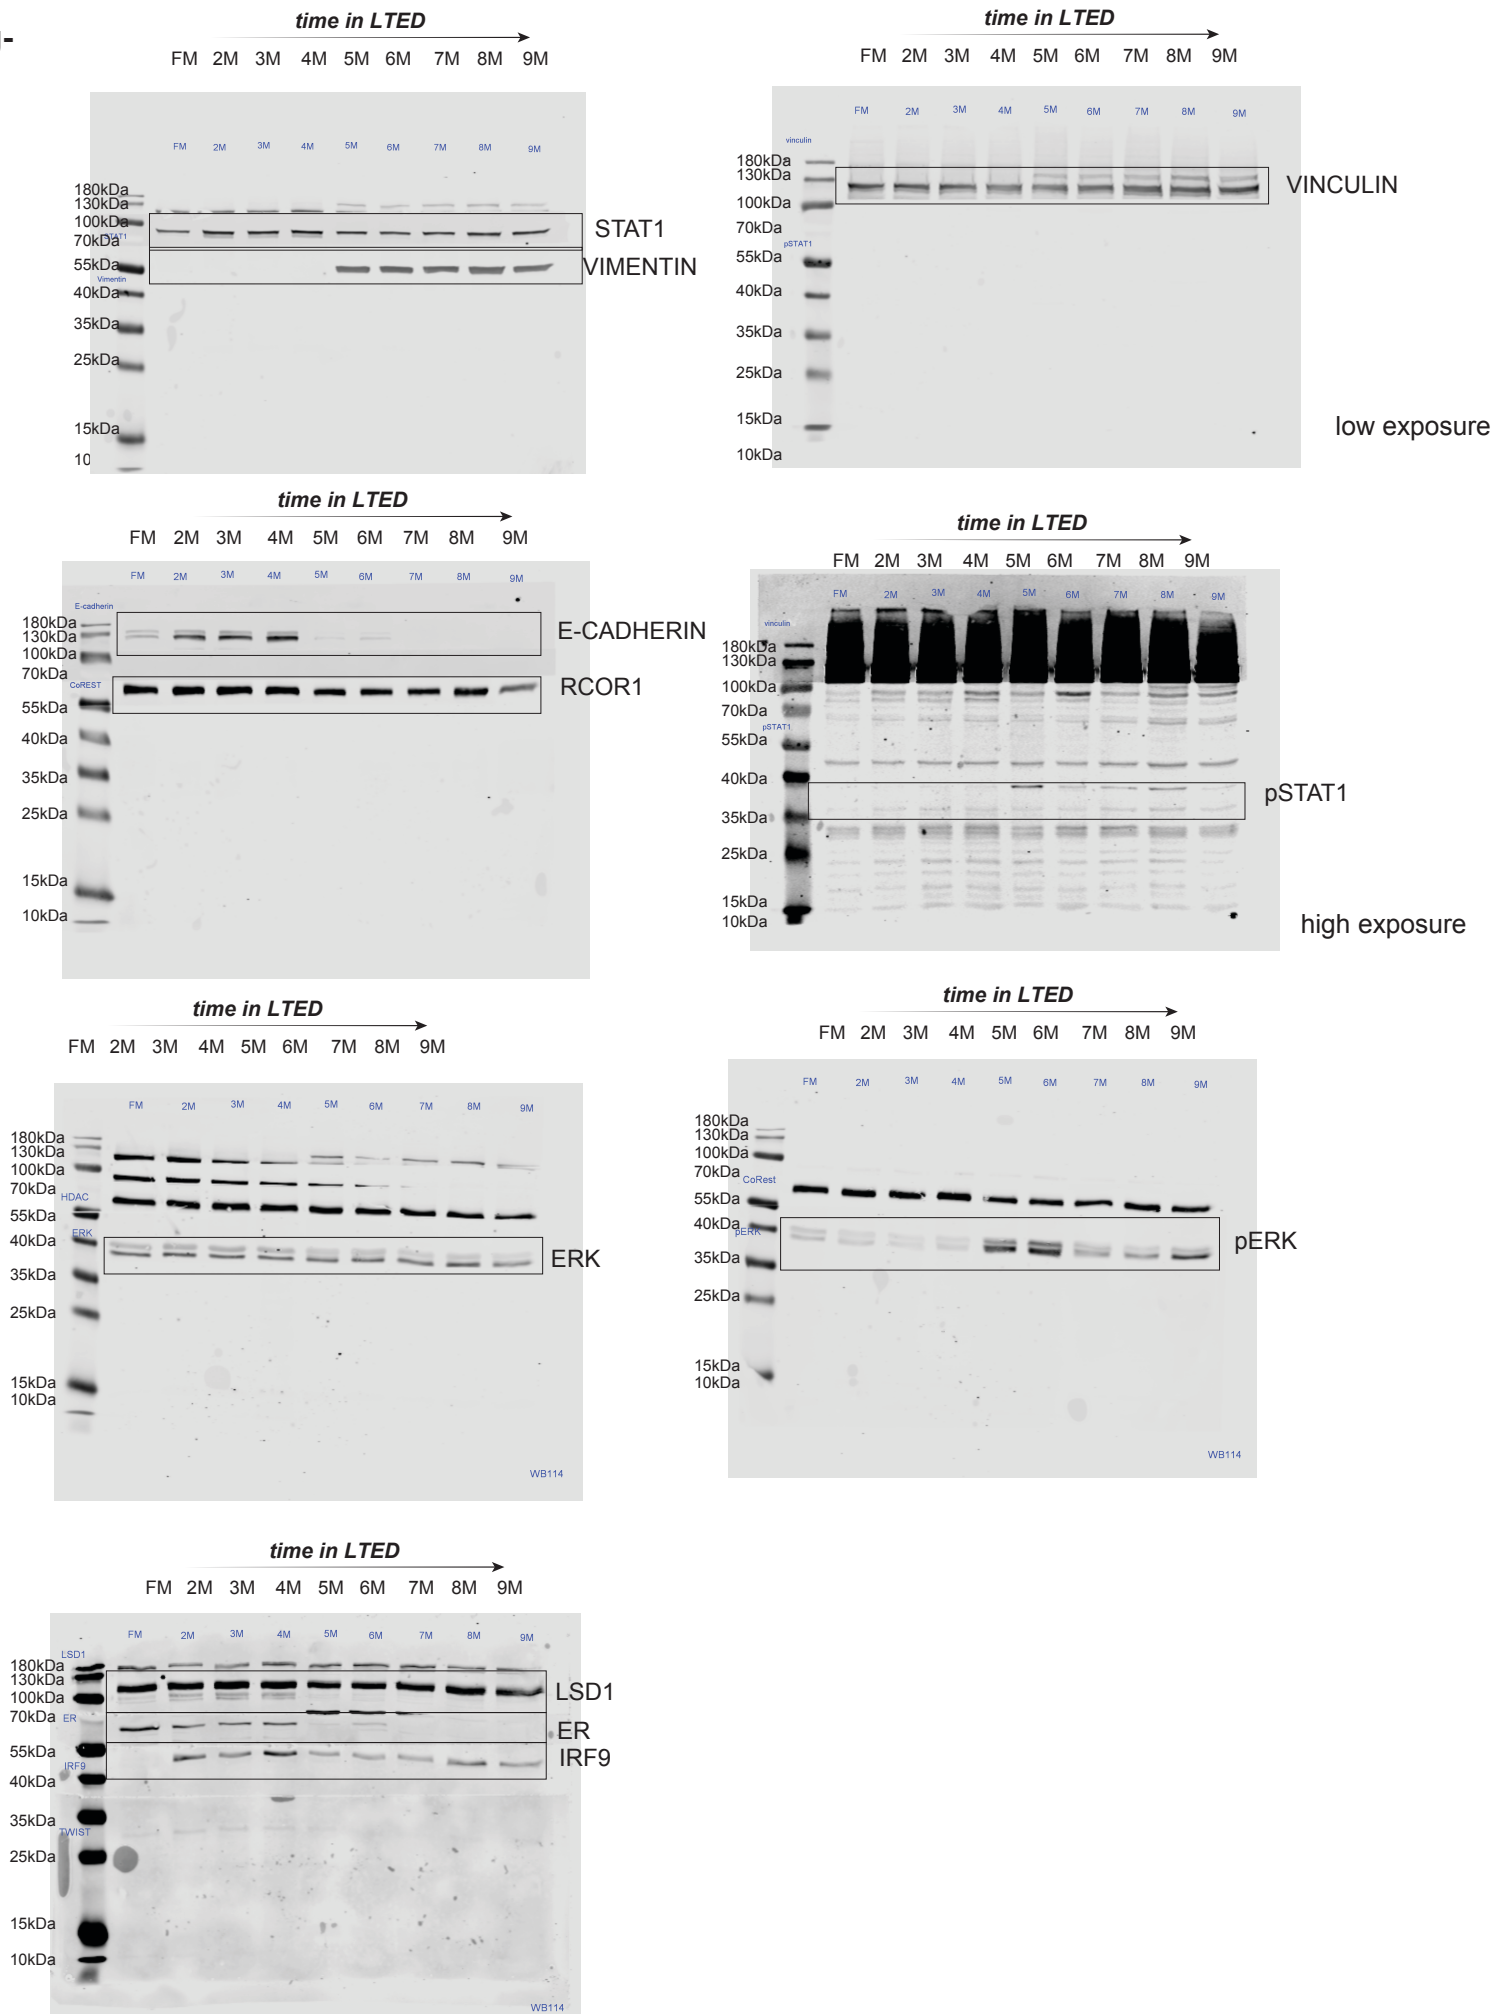

Supplement: NIHMS1844909-supplement-1844909_SD_Fig_1.pdf [file NIHMS1844909-supplement-1844909_SD_Fig_1.pdf]

# Source Data Figure 3

**C-**

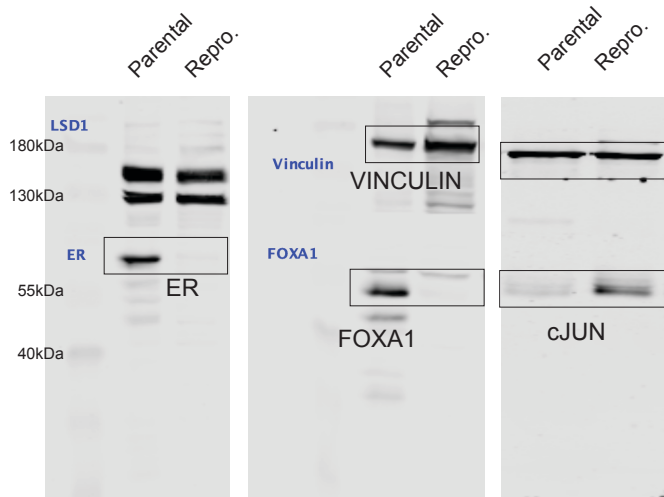

**i-**

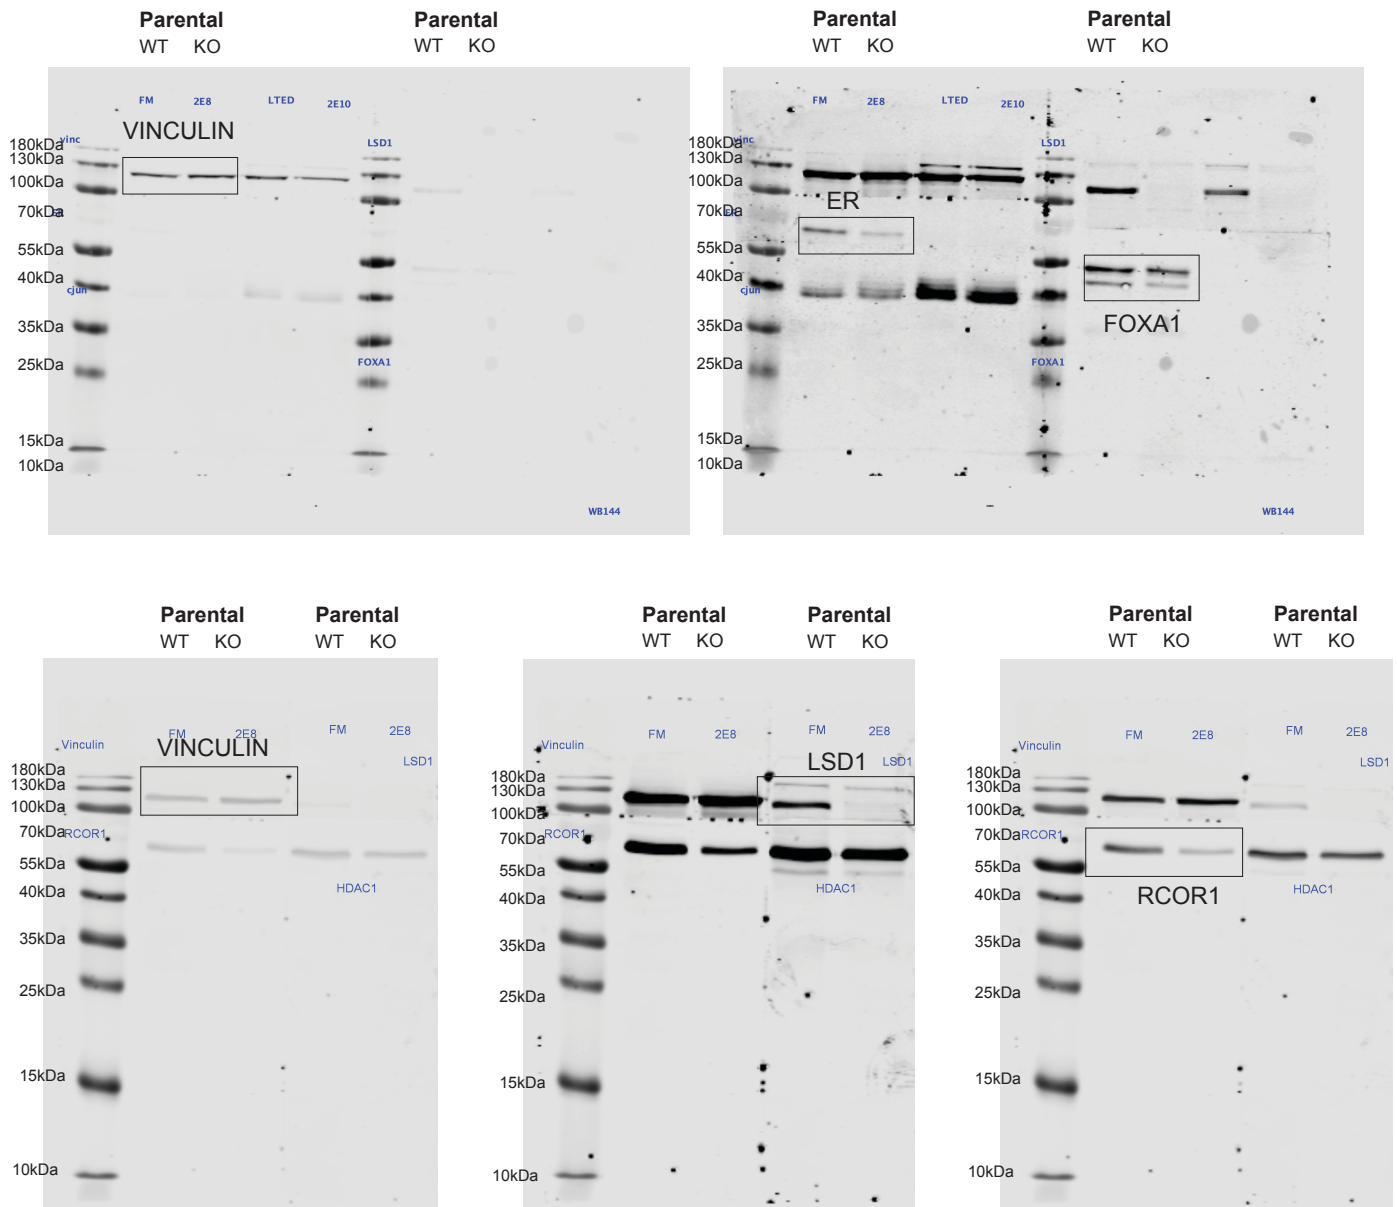

Supplement: NIHMS1844909-supplement-1844909_SD_Fig_3.pdf [file NIHMS1844909-supplement-1844909_SD_Fig_3.pdf]

# Source Data Figure 4

a-

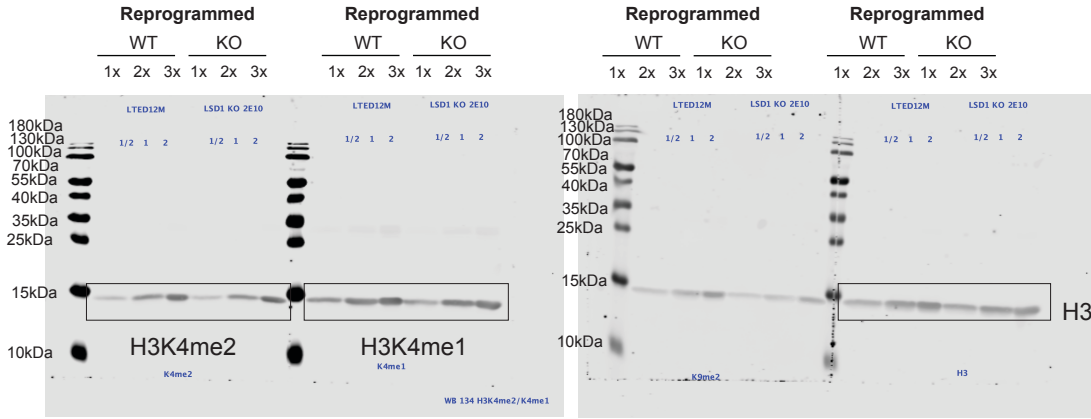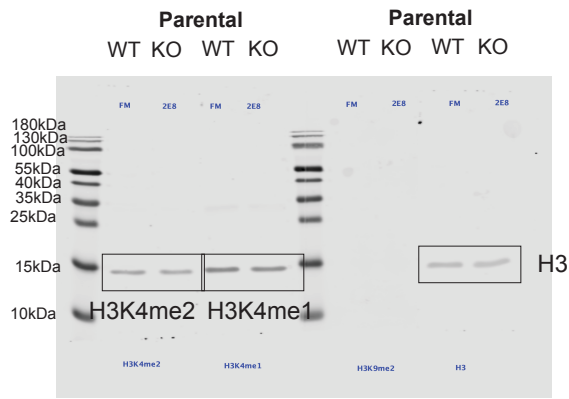

i-

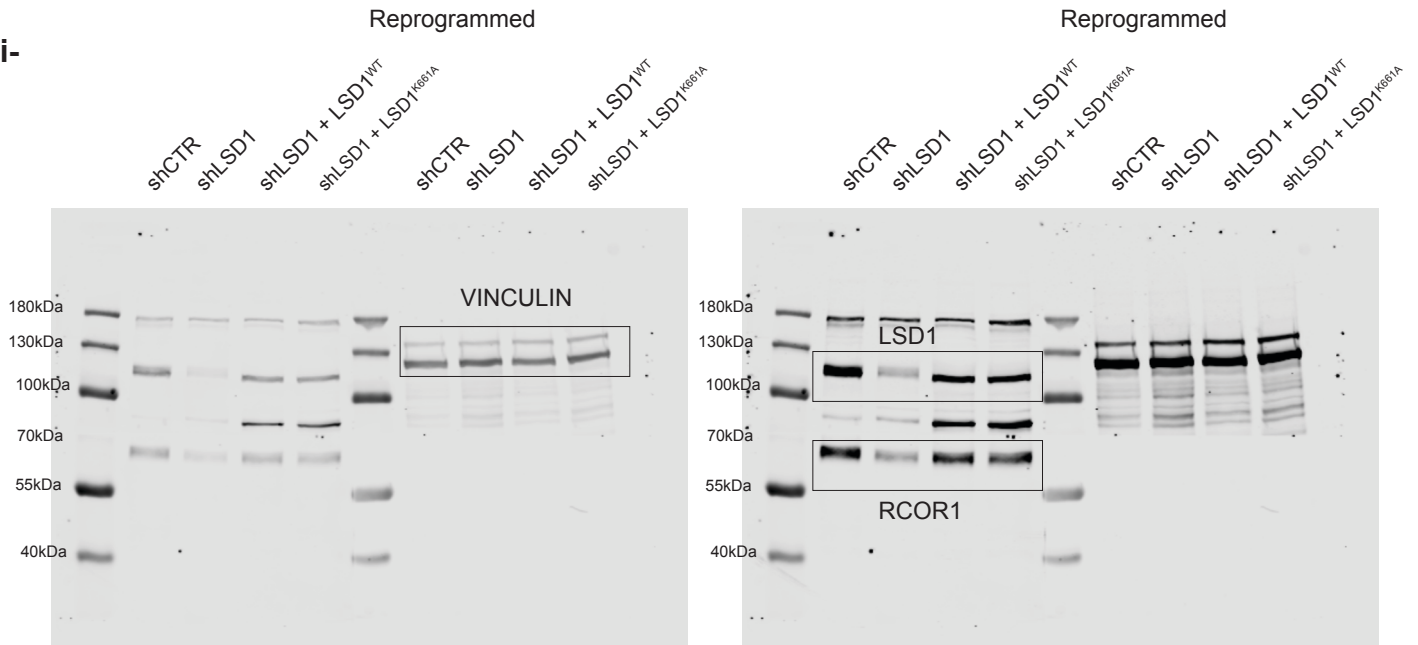

Supplement: NIHMS1844909-supplement-1844909_SD_Fig_4.pdf [file NIHMS1844909-supplement-1844909_SD_Fig_4.pdf]

# Source Data Figure 5

**b-**

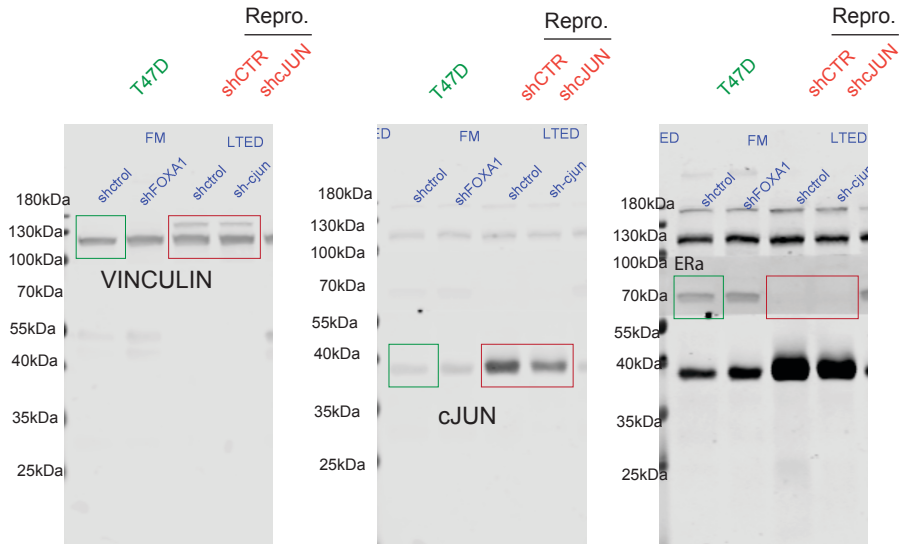

Supplement: NIHMS1844909-supplement-1844909_SD_Fig_5.pdf [file NIHMS1844909-supplement-1844909_SD_Fig_5.pdf]

# Source Data Figure 6

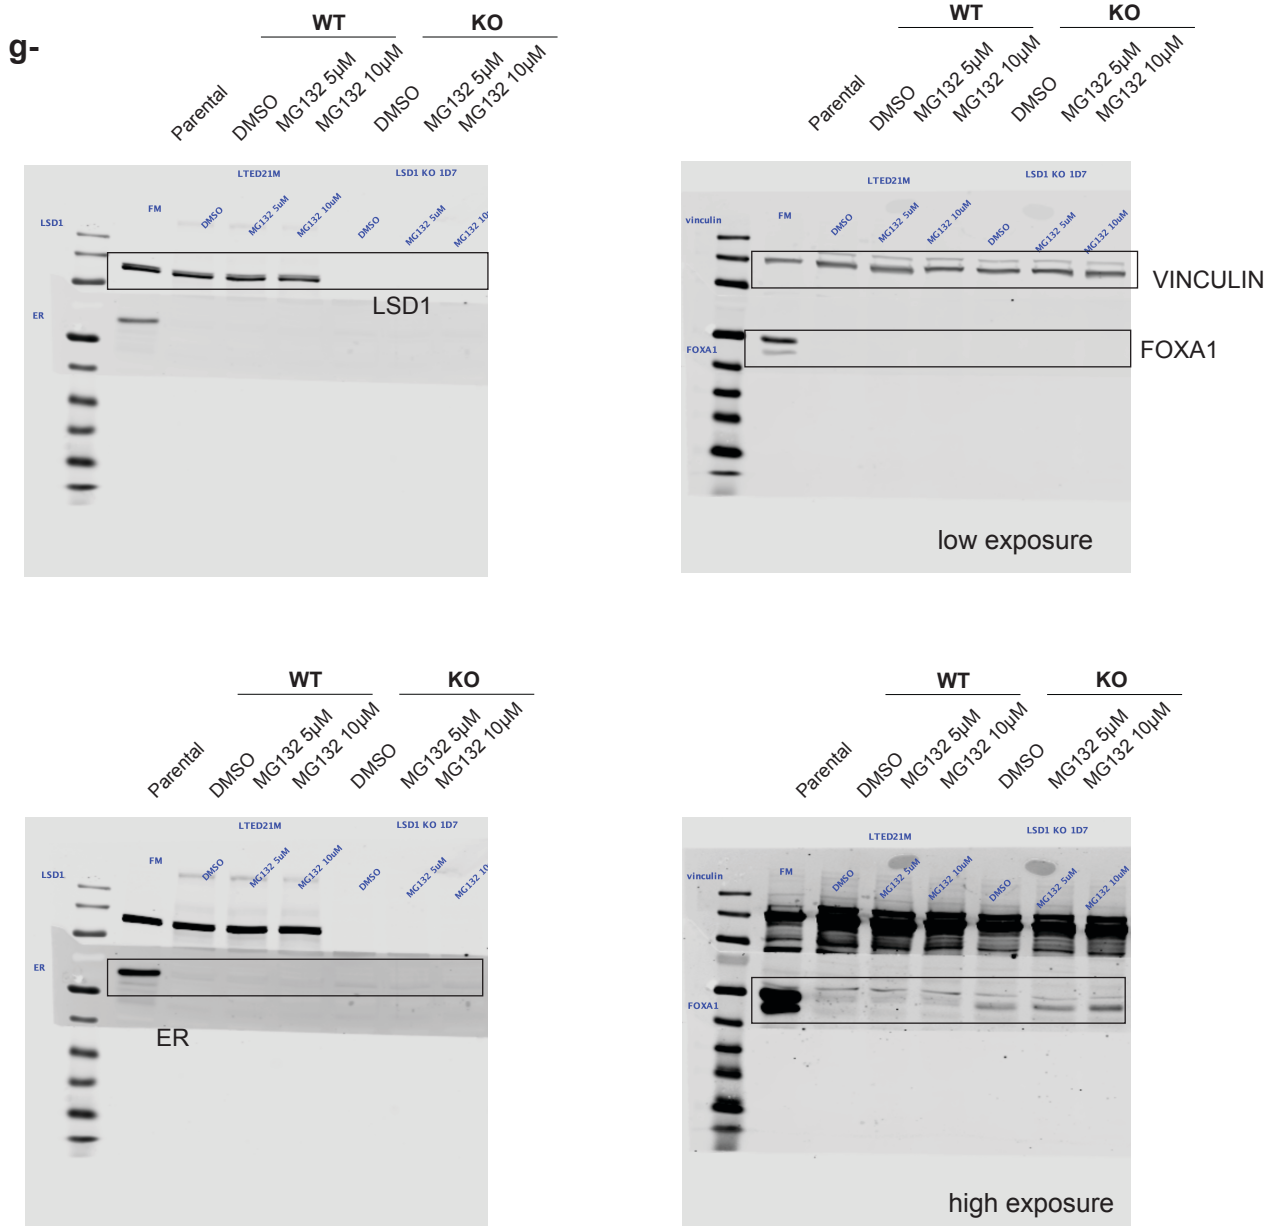

Supplement: NIHMS1844909-supplement-1844909_SD_Fig_6.pdf [file NIHMS1844909-supplement-1844909_SD_Fig_6.pdf]
